# Supplementary material for: Quantitative estimation of wastewater quality parameters by hyperspectral band screening using GC, VIP and SPA
Source: PeerJ. 2019 Dec 12;7:e8255. doi: 10.7717/peerj.8255 (PMC6911691; doi:10.7717/peerj.8255)
Supplement: Supplemental Information 1 [file peerj-07-8255-s001.xlsx]

## Sheet: Sheet1
samples	BOD	COD	TA	NH3-N	TDS	TH
1	86	425	251.7	34.443	351	1.09
2	84.9882	420	248.739	34.0329	346.871	1.07718
3	83.9765	415	245.778	33.6229	342.741	1.06435
4	82.9647	410	242.816	33.2129	338.612	1.05153
5	81.9529	405	239.855	32.8028	334.482	1.03871
6	80.9412	400	236.894	32.3928	330.353	1.02588
7	79.9294	395	233.933	31.9828	326.224	1.01306
8	78.9176	390	230.972	31.5727	322.094	1.00024
9	77.9059	385	228.011	31.1627	317.965	0.987412
10	76.8941	380	225.049	30.7526	313.835	0.974588
11	75.8824	375	222.088	30.3426	309.706	0.961765
12	74.8706	370	219.127	29.9326	305.576	0.948941
13	73.8588	365	216.166	29.5225	301.447	0.936118
14	72.8471	360	213.205	29.1125	297.318	0.923294
15	71.8353	355	210.244	28.7025	293.188	0.910471
16	70.8235	350	207.282	28.2924	289.059	0.897647
17	69.8118	345	204.321	27.8824	284.929	0.884824
18	68.8	340	201.36	27.4724	280.8	0.872
19	67.7882	335	198.399	27.0623	276.671	0.859176
20	66.7765	330	195.438	26.6523	272.541	0.846353
21	65.7647	325	192.476	26.2423	268.412	0.833529
22	64.7529	320	189.515	25.8322	264.282	0.820706
23	63.7412	315	186.554	25.4222	260.153	0.807882
24	62.7294	310	183.593	25.0122	256.024	0.795059
25	61.7176	305	180.632	24.6021	251.894	0.782235
26	60.7059	300	177.671	24.1921	247.765	0.769412
27	59.6941	295	174.709	23.782	243.635	0.756588
28	58.6824	290	171.748	23.372	239.506	0.743765
29	57.6706	285	168.787	22.962	235.376	0.730941
30	56.6588	280	165.826	22.5519	231.247	0.718118
31	55.6471	275	162.865	22.1419	227.118	0.705294
32	54.6353	270	159.904	21.7319	222.988	0.692471
33	53.6235	265	156.942	21.3218	218.859	0.679647
34	52.6118	260	153.981	20.9118	214.729	0.666824
35	51.6	255	151.02	20.5018	210.6	0.654
36	50.5882	250	148.059	20.0917	206.471	0.641176
37	49.5765	245	145.098	19.6817	202.341	0.628353
38	48.5647	240	142.136	19.2717	198.212	0.615529
39	47.5529	235	139.175	18.8616	194.082	0.602706
40	46.5412	230	136.214	18.4516	189.953	0.589882
41	45.5294	225	133.253	18.0416	185.824	0.577059
42	44.5176	220	130.292	17.6315	181.694	0.564235
43	43.5059	215	127.331	17.2215	177.565	0.551412
44	42.4941	210	124.369	16.8114	173.435	0.538588
45	41.4824	205	121.408	16.4014	169.306	0.525765
46	40.4706	200	118.447	15.9914	165.176	0.512941
47	39.4588	195	115.486	15.5813	161.047	0.500118
48	38.4471	190	112.525	15.1713	156.918	0.487294
49	37.4353	185	109.564	14.7613	152.788	0.474471
50	36.4235	180	106.602	14.3512	148.659	0.461647
51	35.4118	175	103.641	13.9412	144.529	0.448824
52	34.4	170	100.68	13.5312	140.4	0.436
53	33.3882	165	97.7188	13.1211	136.271	0.423176
54	32.3765	160	94.7576	12.7111	132.141	0.410353
55	31.3647	155	91.7965	12.3011	128.012	0.397529
56	30.3529	150	88.8353	11.891	123.882	0.384706
57	29.3412	145	85.8741	11.481	119.753	0.371882
58	28.3294	140	82.9129	1.66146	115.624	0.359059
59	8.19643	135	141.769	1.59993	311.464	1.08964
60	7.89286	130	136.519	1.53839	299.929	1.04929
61	7.58929	125	131.268	1.47686	288.393	1.00893
62	7.28571	120	126.017	1.41532	276.857	0.968571
63	6.98214	115	120.766	1.35379	265.321	0.928214
64	6.67857	110	115.516	1.29225	253.786	0.887857
65	6.375	105	110.265	1.23071	242.25	0.8475
66	6.07143	100	105.014	1.16918	230.714	0.807143
67	5.76786	95	99.7636	1.10764	219.179	0.766786
68	5.46429	90	94.5129	1.04611	207.643	0.726429
69	5.16071	85	89.2621	0.984571	196.107	0.686071
70	4.85714	80	84.0114	0.923036	184.571	0.645714
71	4.55357	75	78.7607	0.8615	173.036	0.605357
72	4.25	70	73.51	0.799964	161.5	0.565
73	3.94643	65	68.2593	0.738429	149.964	0.524643
74	3.64286	60	63.0086	0.676893	138.429	0.484286
75	3.33929	55	57.7579	0.615357	126.893	0.443929
76	3.03571	50	52.5071	0.553821	115.357	0.403571
77	2.73214	45	47.2564	0.492286	103.821	0.363214
78	2.42857	40	42.0057	0.43075	92.2857	0.322857
79	2.125	35	36.755	0.369214	80.75	0.2825
80	1.82143	30	31.5043	0.307679	69.2143	0.242143
81	1.51786	25	26.2536	1.14867	57.6786	0.201786
82	0.1	23	67.4333	0.203	229.333	0.78
83	6.2	20	103.5	0.12	343	1.11
84	4.65	15	77.625	0.012	257.25	0.8325
85	3.1	10	51.75	0.01	171.5	0.555
86	1.55	5	25.875	0.005	85.75	0.2775
87	0	0	0	0	0	0
