# Supplementary material for: Quantitative estimation of wastewater quality parameters by hyperspectral band screening using GC, VIP and SPA
Source: PeerJ. 2019 Dec 12;7:e8255. doi: 10.7717/peerj.8255 (PMC6911691; doi:10.7717/peerj.8255)
Supplement: Supplemental Information 2 [file peerj-07-8255-s002.xlsx]

## Sheet: R
Samples	400	401	402	403	404	405	406	407	408	409	410	411	412	413	414	415	416	417	418	419	420	421	422	423	424	425	426	427	428	429	430	431	432	433	434	435	436	437	438	439	440	441	442	443	444	445	446	447	448
1	0.33606	0.34468	0.35375	0.3624	0.36883	0.37232	0.37385	0.3739	0.37267	0.37092	0.37028	0.37095	0.37154	0.37003	0.36685	0.36414	0.36364	0.36372	0.36212	0.3582	0.35375	0.34936	0.34522	0.34139	0.33745	0.33211	0.32542	0.31872	0.31358	0.31054	0.30908	0.30839	0.30859	0.3098	0.31185	0.31407	0.3165	0.31936	0.32239	0.32484	0.32648	0.32749	0.32833	0.32922	0.33032	0.33193	0.33433	0.33617	0.33666
2	0.52523	0.54275	0.55677	0.56797	0.57835	0.58759	0.59162	0.58989	0.58574	0.58363	0.58272	0.58105	0.57831	0.57768	0.57768	0.5759	0.57218	0.56905	0.56568	0.56076	0.55483	0.5485	0.54234	0.53657	0.53069	0.52164	0.50946	0.49772	0.48986	0.48524	0.48229	0.48042	0.4811	0.48396	0.48744	0.49063	0.49515	0.50034	0.50436	0.50732	0.50999	0.51193	0.51231	0.51277	0.51481	0.51845	0.52201	0.52431	0.52506
3	0.43059	0.4483	0.46199	0.47151	0.4789	0.48468	0.48655	0.48485	0.48182	0.47973	0.47897	0.4786	0.47765	0.47651	0.47617	0.47584	0.47312	0.46844	0.46478	0.46255	0.45799	0.45223	0.44734	0.44347	0.43832	0.43153	0.42299	0.41333	0.40456	0.39865	0.39617	0.39596	0.39713	0.39988	0.40408	0.4084	0.41258	0.41609	0.41821	0.41909	0.42056	0.42263	0.42366	0.42435	0.42616	0.42904	0.43117	0.43242	0.43321
4	0.62265	0.64426	0.66289	0.6783	0.69116	0.69986	0.70125	0.69721	0.69243	0.68991	0.68961	0.68948	0.68784	0.68674	0.68622	0.68392	0.6779	0.67059	0.66441	0.65972	0.65411	0.64617	0.63745	0.62987	0.62299	0.61341	0.59945	0.58377	0.57306	0.5673	0.56357	0.56036	0.56027	0.563	0.5669	0.57118	0.5762	0.58117	0.58509	0.58881	0.59229	0.59444	0.59466	0.59514	0.59711	0.60051	0.60436	0.6074	0.60841
5	0.73824	0.76209	0.78455	0.80449	0.82019	0.82834	0.82768	0.823	0.81936	0.81675	0.81474	0.81332	0.8128	0.81245	0.81037	0.80609	0.8009	0.79533	0.78857	0.78026	0.77145	0.76232	0.75354	0.74552	0.73696	0.72451	0.70779	0.69015	0.6766	0.66815	0.66326	0.66049	0.66105	0.66475	0.67018	0.67551	0.68094	0.68624	0.69072	0.69446	0.69789	0.70048	0.70164	0.70291	0.70535	0.70883	0.71213	0.71488	0.71644
6	0.7312	0.75467	0.77835	0.79931	0.81375	0.81996	0.81933	0.81473	0.80952	0.80655	0.80627	0.80672	0.80583	0.80478	0.80273	0.79876	0.79339	0.78705	0.77977	0.77212	0.76449	0.75637	0.74825	0.73983	0.72919	0.71636	0.70146	0.68537	0.67187	0.6631	0.6584	0.65593	0.65637	0.65985	0.66557	0.67185	0.67757	0.68246	0.68675	0.69088	0.69454	0.69709	0.69841	0.69977	0.70214	0.70559	0.70914	0.71216	0.71375
7	0.73903	0.76446	0.78819	0.8068	0.81954	0.82762	0.82889	0.82483	0.81961	0.81742	0.81723	0.81713	0.81644	0.81468	0.8113	0.80702	0.80259	0.79664	0.78964	0.78237	0.77478	0.76651	0.75741	0.74761	0.73738	0.72533	0.7105	0.69408	0.68016	0.67111	0.66652	0.66421	0.66466	0.66791	0.67298	0.67859	0.68448	0.6901	0.69514	0.69974	0.70351	0.70601	0.70719	0.70877	0.71142	0.71463	0.71779	0.72046	0.72182
8	0.60977	0.62945	0.64896	0.66512	0.67572	0.68193	0.68425	0.68245	0.67773	0.6734	0.67093	0.67096	0.67219	0.66968	0.66511	0.66156	0.65892	0.65397	0.64834	0.64358	0.6382	0.63112	0.62269	0.61404	0.60601	0.59549	0.58174	0.56799	0.5581	0.55154	0.54721	0.54489	0.54527	0.54836	0.55297	0.55733	0.56097	0.56438	0.56844	0.5731	0.57659	0.57807	0.57843	0.57966	0.58215	0.58515	0.58783	0.59014	0.59129
9	0.43589	0.44922	0.46153	0.47215	0.4801	0.48452	0.48677	0.48702	0.48496	0.48154	0.47891	0.47835	0.47929	0.47867	0.47598	0.47287	0.4708	0.46801	0.4647	0.46117	0.45648	0.45104	0.44567	0.44056	0.43526	0.42822	0.41869	0.40846	0.40177	0.39817	0.39589	0.39435	0.39436	0.39616	0.39928	0.40263	0.40567	0.40882	0.41246	0.41595	0.41842	0.41932	0.41902	0.41938	0.4213	0.42427	0.4269	0.42865	0.42905
10	0.5996	0.61981	0.63791	0.65419	0.66688	0.67182	0.67276	0.67147	0.6677	0.6627	0.66011	0.66039	0.66147	0.66052	0.65766	0.6542	0.65018	0.64509	0.63994	0.63469	0.62821	0.62137	0.61369	0.60506	0.59761	0.58813	0.57459	0.55961	0.54916	0.54225	0.53742	0.53561	0.5366	0.53942	0.5435	0.54853	0.55282	0.55617	0.55942	0.56306	0.56621	0.56808	0.56895	0.5698	0.57144	0.57423	0.57766	0.58014	0.5809
11	0.37667	0.38654	0.39606	0.4059	0.4144	0.41848	0.41983	0.41948	0.41776	0.41578	0.41449	0.41361	0.41244	0.40996	0.40726	0.40542	0.40351	0.40089	0.39817	0.39502	0.39048	0.3864	0.38221	0.37688	0.37166	0.36562	0.35772	0.34892	0.34306	0.33946	0.3368	0.3355	0.33684	0.33885	0.33981	0.34128	0.34407	0.34706	0.34923	0.35186	0.35397	0.3548	0.35498	0.35556	0.35706	0.35939	0.36157	0.36268	0.36279
12	0.28594	0.29363	0.30102	0.30874	0.31548	0.31919	0.31942	0.31734	0.3148	0.31298	0.31214	0.31194	0.31142	0.30894	0.30592	0.3038	0.30218	0.30028	0.29782	0.29445	0.29004	0.28631	0.28331	0.27997	0.27529	0.26939	0.26338	0.25832	0.25369	0.24908	0.24555	0.24491	0.24611	0.24744	0.24849	0.25054	0.25299	0.25468	0.25515	0.25561	0.25637	0.25704	0.25718	0.25717	0.25743	0.25828	0.25962	0.26066	0.26086
13	0.33245	0.34393	0.35425	0.36237	0.36816	0.37251	0.37456	0.37368	0.37067	0.36778	0.36597	0.36588	0.36694	0.36598	0.36376	0.36233	0.36185	0.35981	0.35674	0.3535	0.34947	0.34485	0.34067	0.33743	0.33384	0.32826	0.32094	0.3137	0.30789	0.30434	0.30291	0.30244	0.30298	0.30435	0.306	0.30785	0.3107	0.31411	0.31722	0.31963	0.32102	0.3215	0.3214	0.32182	0.32341	0.32567	0.3275	0.32925	0.33041
14	0.43427	0.44874	0.46216	0.47188	0.47805	0.48345	0.48625	0.48563	0.4831	0.48149	0.47995	0.47849	0.4779	0.47719	0.47553	0.47347	0.47185	0.46879	0.46372	0.4578	0.45305	0.44935	0.44479	0.43839	0.43272	0.4268	0.41841	0.40763	0.39938	0.39523	0.39384	0.39261	0.39219	0.39388	0.39767	0.40186	0.40539	0.40799	0.41032	0.41325	0.41554	0.41654	0.41714	0.41851	0.42054	0.42261	0.42415	0.42579	0.42727
15	0.42547	0.44021	0.45266	0.46214	0.46948	0.47416	0.47424	0.47203	0.47051	0.46979	0.46897	0.46762	0.46636	0.46576	0.46488	0.46323	0.46106	0.4571	0.45268	0.44923	0.44566	0.44081	0.43569	0.43109	0.426	0.41895	0.4093	0.39861	0.39064	0.38671	0.3855	0.38428	0.3841	0.38617	0.38985	0.39308	0.39641	0.39974	0.40273	0.40591	0.40845	0.4095	0.4094	0.40998	0.41169	0.41403	0.41623	0.41806	0.41931
16	0.28436	0.29521	0.30496	0.31085	0.31396	0.31736	0.31968	0.31976	0.31743	0.31424	0.31284	0.31346	0.31401	0.31183	0.30878	0.30744	0.3076	0.3057	0.30193	0.29824	0.296	0.294	0.29051	0.28559	0.28226	0.2783	0.27199	0.26498	0.26127	0.25922	0.25699	0.25512	0.25475	0.25611	0.25873	0.26167	0.26361	0.26525	0.26794	0.27051	0.27128	0.27085	0.2713	0.27278	0.27448	0.27563	0.27619	0.2774	0.27891
17	0.20363	0.21266	0.22078	0.22565	0.22756	0.22927	0.23048	0.22889	0.2244	0.22182	0.22174	0.22232	0.22185	0.22057	0.2191	0.21846	0.21869	0.2166	0.21304	0.21028	0.20871	0.20687	0.20411	0.20073	0.1985	0.19676	0.19339	0.18786	0.1833	0.18109	0.18041	0.17896	0.17801	0.17936	0.18246	0.18432	0.18519	0.1859	0.187	0.18799	0.18821	0.18788	0.18787	0.1888	0.19035	0.19156	0.19174	0.19201	0.19275
18	0.33536	0.34586	0.35698	0.36604	0.37115	0.37324	0.37285	0.37173	0.37114	0.37002	0.36828	0.36705	0.36693	0.36627	0.36457	0.36219	0.35994	0.35814	0.35574	0.35196	0.34747	0.34324	0.33963	0.33611	0.33123	0.32487	0.31797	0.31155	0.30622	0.30239	0.30017	0.29971	0.30035	0.30161	0.30369	0.30681	0.30942	0.31161	0.31421	0.31663	0.31794	0.31827	0.31851	0.31897	0.32008	0.32197	0.32428	0.32579	0.32599
19	0.3163	0.32671	0.33645	0.34414	0.34899	0.35161	0.35273	0.35254	0.35098	0.34817	0.34662	0.34647	0.34561	0.34442	0.34363	0.34247	0.34022	0.33871	0.33663	0.33271	0.32774	0.32374	0.32125	0.31897	0.31475	0.30933	0.3036	0.29772	0.29167	0.28703	0.28459	0.28352	0.28381	0.28526	0.28759	0.29084	0.29396	0.29597	0.29735	0.29999	0.30211	0.30258	0.30242	0.30313	0.30443	0.30577	0.30733	0.30863	0.30933
20	0.63763	0.65786	0.67504	0.68957	0.70032	0.7051	0.70468	0.70241	0.70108	0.69964	0.69692	0.69384	0.69181	0.69049	0.6879	0.6831	0.67776	0.67435	0.67027	0.66295	0.65376	0.6451	0.63758	0.63037	0.62232	0.61152	0.59788	0.58353	0.57164	0.56362	0.55903	0.55647	0.55676	0.5596	0.56391	0.56897	0.57425	0.5784	0.58097	0.58408	0.5871	0.58893	0.58963	0.59093	0.59314	0.59586	0.59861	0.60074	0.60165
21	0.44168	0.45522	0.46826	0.4788	0.48515	0.48749	0.48778	0.48774	0.4878	0.48716	0.48551	0.48298	0.4803	0.47849	0.47657	0.47366	0.47019	0.4674	0.46479	0.46092	0.45446	0.44758	0.44238	0.43828	0.43155	0.42312	0.41461	0.40648	0.3983	0.39198	0.38866	0.38753	0.38784	0.38933	0.39188	0.39526	0.39862	0.4015	0.40414	0.40683	0.4087	0.40929	0.40914	0.41003	0.41187	0.41375	0.41544	0.4169	0.41746
22	0.14353	0.14859	0.15357	0.15634	0.15676	0.15729	0.15765	0.15761	0.15709	0.15609	0.15524	0.15511	0.15569	0.1565	0.15577	0.15357	0.15241	0.15253	0.15168	0.14891	0.14583	0.14339	0.14203	0.14108	0.13927	0.13658	0.13363	0.13123	0.12966	0.12792	0.12615	0.12603	0.12688	0.12768	0.12851	0.1303	0.13145	0.13183	0.1323	0.13292	0.13328	0.13355	0.13405	0.13384	0.13328	0.13327	0.13401	0.13462	0.1348
23	0.3698	0.38236	0.39287	0.40038	0.40436	0.40539	0.40493	0.4028	0.39888	0.3953	0.39362	0.39293	0.39155	0.39058	0.3894	0.38665	0.38201	0.37758	0.37379	0.36994	0.36506	0.35939	0.35418	0.34995	0.34498	0.33832	0.33037	0.32242	0.316	0.31106	0.30733	0.30547	0.30598	0.30781	0.31009	0.31302	0.31499	0.31595	0.317	0.31798	0.31831	0.31845	0.31919	0.31994	0.32048	0.32076	0.32085	0.32126	0.32189
24	0.3298	0.34051	0.35041	0.35937	0.36555	0.3674	0.36846	0.36815	0.36501	0.36171	0.36136	0.36307	0.36396	0.36362	0.36283	0.36237	0.36213	0.36066	0.35736	0.35336	0.35088	0.34823	0.34433	0.34007	0.33705	0.33273	0.32611	0.31883	0.31351	0.31044	0.30899	0.30889	0.31011	0.31235	0.31534	0.31891	0.32224	0.32517	0.32792	0.33	0.33147	0.33277	0.3342	0.33557	0.33704	0.33864	0.34019	0.34222	0.34424
25	0.29737	0.30673	0.31485	0.32174	0.32724	0.32999	0.32946	0.32782	0.32642	0.32293	0.31996	0.31981	0.32172	0.32189	0.32082	0.31937	0.31718	0.31388	0.31012	0.30654	0.30313	0.2999	0.29641	0.29237	0.28846	0.28449	0.27937	0.27259	0.26621	0.26199	0.26016	0.25957	0.25967	0.26082	0.26343	0.26717	0.2699	0.27124	0.27233	0.27346	0.27386	0.27388	0.27447	0.27511	0.27573	0.27647	0.27746	0.27843	0.27904
26	0.32406	0.33715	0.34865	0.35681	0.36195	0.36519	0.36691	0.3666	0.36406	0.3612	0.35988	0.35979	0.35987	0.36052	0.36089	0.36042	0.35937	0.35801	0.35584	0.3528	0.34984	0.34701	0.34344	0.33887	0.33478	0.33006	0.32397	0.31754	0.31267	0.30877	0.30619	0.3067	0.30904	0.3116	0.31415	0.31766	0.32122	0.32415	0.32632	0.32812	0.32985	0.3312	0.33178	0.3326	0.33403	0.33583	0.3377	0.33981	0.34136
27	0.23533	0.2433	0.25009	0.25534	0.25828	0.25854	0.25869	0.25849	0.25634	0.2525	0.25067	0.2515	0.25257	0.252	0.25077	0.24961	0.24801	0.24603	0.24439	0.24298	0.24052	0.23642	0.23231	0.22981	0.2278	0.22406	0.2185	0.21292	0.20919	0.20685	0.20497	0.20376	0.20438	0.20622	0.20849	0.21145	0.21353	0.21436	0.21482	0.21497	0.21476	0.21515	0.21669	0.21713	0.21672	0.21677	0.21792	0.21923	0.22004
28	0.31375	0.32584	0.33545	0.34226	0.3468	0.34983	0.3518	0.35147	0.34838	0.34471	0.34344	0.34461	0.34563	0.34523	0.34396	0.34262	0.34173	0.34037	0.33737	0.33344	0.33085	0.32861	0.32554	0.32133	0.31675	0.31144	0.30537	0.2993	0.29441	0.291	0.28927	0.2895	0.29077	0.29246	0.29483	0.29855	0.30215	0.30461	0.30614	0.30775	0.30923	0.31027	0.31103	0.31182	0.31303	0.31478	0.3166	0.3181	0.31917
29	0.50048	0.51692	0.53084	0.54159	0.54887	0.5538	0.5567	0.55599	0.55175	0.5481	0.54654	0.54615	0.54534	0.54435	0.54225	0.53886	0.53548	0.53313	0.52972	0.52421	0.51867	0.51306	0.50678	0.50024	0.4953	0.48796	0.47676	0.46492	0.45699	0.45172	0.4479	0.44667	0.44823	0.45138	0.455	0.459	0.46259	0.46571	0.46877	0.4716	0.47388	0.47564	0.47706	0.47844	0.48036	0.48272	0.48459	0.48627	0.48773
30	0.64344	0.66625	0.6857	0.70254	0.71519	0.72015	0.72169	0.7223	0.72152	0.71829	0.71587	0.71563	0.71659	0.71733	0.71631	0.71376	0.71139	0.70789	0.70235	0.69572	0.68972	0.68268	0.67466	0.66699	0.66074	0.65192	0.63851	0.6233	0.61217	0.60458	0.5994	0.59786	0.60057	0.60571	0.61168	0.61863	0.62525	0.63036	0.63377	0.63682	0.63997	0.64285	0.64507	0.64733	0.65024	0.65368	0.65664	0.65911	0.66136
31	0.36533	0.38126	0.39321	0.40078	0.40546	0.40898	0.41162	0.41229	0.41072	0.40879	0.4083	0.40923	0.40998	0.41022	0.40965	0.40816	0.4065	0.40492	0.40218	0.39845	0.3958	0.39263	0.3886	0.38454	0.38069	0.37499	0.36746	0.36012	0.35475	0.35076	0.34779	0.34705	0.34927	0.35284	0.35636	0.36042	0.36455	0.36802	0.37052	0.37228	0.37356	0.37487	0.37655	0.37826	0.38007	0.38197	0.38367	0.38569	0.38764
32	0.45339	0.46923	0.48326	0.49428	0.50183	0.50685	0.50905	0.50799	0.50466	0.50161	0.49991	0.50012	0.50141	0.50058	0.49828	0.49588	0.49332	0.49103	0.48878	0.48529	0.47982	0.47438	0.4692	0.46386	0.45888	0.45207	0.4424	0.43163	0.42373	0.41871	0.41553	0.41417	0.41571	0.41947	0.42405	0.42853	0.43268	0.43642	0.43957	0.44169	0.44282	0.44362	0.44492	0.44669	0.44854	0.45037	0.45257	0.45506	0.4569
33	0.36532	0.37882	0.38968	0.3981	0.40437	0.40809	0.40938	0.40818	0.40549	0.40373	0.40399	0.40533	0.40596	0.40609	0.40561	0.40386	0.40067	0.39838	0.39634	0.39307	0.38859	0.38469	0.38154	0.3783	0.37444	0.3685	0.36061	0.35281	0.34695	0.343	0.34079	0.34046	0.34176	0.3446	0.34867	0.35335	0.35692	0.359	0.36077	0.36319	0.36487	0.3658	0.36751	0.37001	0.37185	0.37271	0.37422	0.37652	0.37837
34	0.36603	0.37899	0.38939	0.39838	0.40642	0.41129	0.41212	0.41051	0.40871	0.40775	0.40705	0.40584	0.40435	0.40452	0.4049	0.40351	0.40024	0.39759	0.39593	0.39405	0.39049	0.38568	0.38127	0.37806	0.37422	0.36776	0.35954	0.35236	0.34721	0.34294	0.33959	0.33899	0.34105	0.34408	0.34701	0.35061	0.35438	0.3574	0.35934	0.3611	0.36303	0.36468	0.36538	0.36603	0.36758	0.36996	0.37223	0.37402	0.37526
35	0.28441	0.29556	0.3046	0.30989	0.3132	0.31784	0.32121	0.32175	0.32009	0.31793	0.31705	0.31774	0.31831	0.31714	0.31622	0.31579	0.3137	0.31102	0.30954	0.30888	0.30617	0.30303	0.30054	0.29809	0.29444	0.29034	0.28561	0.27997	0.27536	0.27243	0.27098	0.27097	0.27244	0.27475	0.27763	0.28132	0.28449	0.2869	0.28923	0.29168	0.29338	0.29437	0.29562	0.29688	0.29805	0.29941	0.30101	0.3028	0.30455
36	0.28962	0.29998	0.31032	0.31788	0.32152	0.32309	0.32373	0.32312	0.32098	0.31805	0.3158	0.31536	0.31607	0.31544	0.31352	0.31136	0.30974	0.30774	0.30482	0.30132	0.29789	0.29443	0.29068	0.2865	0.28243	0.27828	0.27281	0.26547	0.25925	0.25574	0.25444	0.25393	0.25448	0.25566	0.25734	0.26042	0.26325	0.26456	0.26493	0.26608	0.26723	0.26775	0.26774	0.26781	0.26859	0.27	0.27124	0.27207	0.27238
37	0.35966	0.37152	0.38456	0.39654	0.40367	0.40554	0.40455	0.4028	0.40142	0.40003	0.39952	0.40057	0.40219	0.40249	0.40252	0.40241	0.40104	0.40011	0.39902	0.3961	0.3912	0.38752	0.38555	0.38337	0.37854	0.37194	0.36561	0.36043	0.35468	0.34928	0.34601	0.34581	0.34856	0.35329	0.35862	0.36367	0.36795	0.37076	0.37216	0.37381	0.3763	0.37916	0.38156	0.38364	0.3854	0.38695	0.38873	0.39109	0.39355
38	0.24985	0.25809	0.26701	0.2751	0.27946	0.28014	0.28116	0.28257	0.2829	0.2825	0.28248	0.28312	0.2838	0.28478	0.28566	0.28542	0.28379	0.28311	0.2825	0.28087	0.27959	0.27888	0.27778	0.27588	0.27372	0.2704	0.26621	0.26213	0.25814	0.25544	0.25472	0.25545	0.2577	0.2613	0.26557	0.26981	0.27378	0.27663	0.27816	0.28025	0.28316	0.28575	0.2869	0.28846	0.29093	0.29347	0.29521	0.29715	0.29945
39	0.26137	0.26856	0.27713	0.28531	0.28997	0.29089	0.29136	0.29191	0.29189	0.29192	0.29239	0.29268	0.29193	0.29085	0.2904	0.29038	0.28968	0.28848	0.28726	0.28589	0.28351	0.28107	0.27934	0.2778	0.27466	0.27033	0.26565	0.26115	0.25697	0.25369	0.25211	0.25285	0.25492	0.2573	0.26009	0.2643	0.26816	0.27046	0.27167	0.2734	0.27544	0.27715	0.27825	0.27984	0.28191	0.28378	0.28513	0.28671	0.28844
40	0.3372	0.35175	0.36451	0.37425	0.38061	0.38476	0.38634	0.38676	0.38808	0.38994	0.39132	0.39274	0.39467	0.39654	0.39877	0.40028	0.39954	0.3989	0.39869	0.39794	0.39618	0.39411	0.39206	0.39002	0.38767	0.38352	0.37792	0.37268	0.36844	0.36485	0.36247	0.36284	0.36639	0.37231	0.37919	0.38573	0.39105	0.39527	0.39914	0.40307	0.40703	0.41082	0.41413	0.41712	0.42038	0.42401	0.42734	0.43091	0.43465
41	0.20429	0.21353	0.22114	0.22543	0.22763	0.23021	0.23141	0.23194	0.23265	0.23229	0.23242	0.2345	0.23802	0.23958	0.23954	0.24032	0.24326	0.2431	0.24045	0.23882	0.23923	0.23851	0.23704	0.23619	0.23524	0.2332	0.22974	0.22584	0.22338	0.22233	0.22205	0.22232	0.22422	0.22796	0.23258	0.23642	0.23961	0.24261	0.24546	0.24766	0.24929	0.25093	0.25319	0.25561	0.25784	0.25999	0.26233	0.26466	0.26695
42	0.28573	0.29609	0.30582	0.31579	0.32447	0.32941	0.33017	0.32981	0.33161	0.33415	0.33581	0.3376	0.34078	0.34404	0.34715	0.34966	0.35112	0.35163	0.35124	0.35062	0.3507	0.35038	0.34947	0.34867	0.34824	0.34553	0.34061	0.33623	0.33301	0.33039	0.32947	0.33225	0.33688	0.34234	0.34857	0.35553	0.36133	0.36563	0.36945	0.3732	0.37675	0.38035	0.38419	0.38811	0.39227	0.39646	0.40016	0.40421	0.40862
43	0.31257	0.32686	0.33813	0.34646	0.35269	0.35733	0.35993	0.36146	0.36307	0.36457	0.36568	0.36713	0.36979	0.37299	0.37499	0.37572	0.377	0.37861	0.3789	0.3774	0.37573	0.37461	0.37424	0.37401	0.37252	0.36876	0.36339	0.35811	0.3539	0.35125	0.35052	0.35187	0.3557	0.36194	0.36957	0.37696	0.38301	0.38736	0.39065	0.39417	0.3981	0.40206	0.40576	0.40953	0.41353	0.41757	0.42129	0.42514	0.42923
44	0.33261	0.34485	0.3558	0.36572	0.37313	0.37655	0.37928	0.38219	0.3838	0.38346	0.38455	0.388	0.39223	0.39558	0.3976	0.39904	0.40062	0.40057	0.39954	0.39902	0.39909	0.39749	0.395	0.3936	0.39326	0.39066	0.38465	0.37754	0.37273	0.3702	0.36926	0.37024	0.37464	0.38174	0.38952	0.39629	0.40175	0.40658	0.41153	0.41569	0.41892	0.42223	0.42653	0.43109	0.43529	0.43896	0.44268	0.44717	0.45175
45	0.29198	0.30384	0.31538	0.32484	0.33074	0.33293	0.33414	0.33589	0.33765	0.33829	0.33884	0.34073	0.34454	0.34765	0.34891	0.34985	0.35204	0.35157	0.34874	0.34664	0.34779	0.3481	0.34583	0.34284	0.3423	0.34008	0.33455	0.32864	0.32556	0.32403	0.32307	0.32355	0.32627	0.33164	0.33865	0.3447	0.34938	0.35333	0.35697	0.36001	0.36308	0.36652	0.3702	0.37371	0.37689	0.38002	0.38349	0.38712	0.39045
46	0.31059	0.3231	0.33503	0.34446	0.35036	0.35465	0.3568	0.35754	0.35864	0.36064	0.36179	0.36336	0.36739	0.37117	0.37314	0.37399	0.3751	0.37558	0.37544	0.37483	0.37373	0.37245	0.37164	0.37144	0.37051	0.36729	0.3622	0.35703	0.35262	0.3498	0.34906	0.35028	0.35412	0.36048	0.36812	0.3756	0.38132	0.38544	0.38964	0.39402	0.3974	0.40034	0.40424	0.40887	0.41338	0.41689	0.41972	0.42363	0.42835
47	0.25835	0.26812	0.27512	0.28175	0.28851	0.29252	0.29369	0.29333	0.29309	0.29366	0.29454	0.29595	0.29813	0.29882	0.29743	0.29657	0.29919	0.30085	0.29917	0.29561	0.29353	0.29103	0.28866	0.28804	0.28817	0.28511	0.27891	0.27312	0.26956	0.26765	0.26657	0.26638	0.268	0.27222	0.27823	0.28341	0.28655	0.28863	0.29117	0.29364	0.29576	0.29769	0.29968	0.30171	0.30394	0.30613	0.30771	0.30974	0.31231
48	0.25645	0.26471	0.27292	0.28036	0.28538	0.2881	0.28923	0.28989	0.29116	0.29275	0.2933	0.29399	0.29646	0.29818	0.29793	0.29735	0.29888	0.29996	0.29933	0.29769	0.29654	0.29455	0.29259	0.29208	0.29185	0.28898	0.28385	0.2792	0.27508	0.27186	0.27067	0.27229	0.27534	0.27947	0.28458	0.28986	0.29352	0.29574	0.29812	0.30094	0.30318	0.3052	0.30814	0.31141	0.31412	0.31606	0.31816	0.32097	0.32384
49	0.24767	0.25499	0.26188	0.26886	0.27459	0.27731	0.27837	0.27956	0.28125	0.28158	0.28097	0.28136	0.28385	0.28594	0.28611	0.28529	0.28564	0.28575	0.28446	0.28265	0.28264	0.28242	0.28041	0.27717	0.27539	0.27321	0.26918	0.26417	0.26006	0.25761	0.25703	0.25794	0.26004	0.26397	0.26926	0.27367	0.27654	0.27882	0.28155	0.28373	0.28522	0.28698	0.28978	0.29226	0.29394	0.29537	0.29761	0.30089	0.30395
50	0.34826	0.35982	0.37008	0.37922	0.38664	0.3907	0.39205	0.39283	0.39395	0.3942	0.39511	0.39719	0.39965	0.4005	0.40023	0.4006	0.40227	0.40257	0.40099	0.39864	0.39682	0.39417	0.39091	0.38854	0.38744	0.38391	0.377	0.36936	0.36412	0.36145	0.36036	0.36027	0.36265	0.36795	0.3748	0.38073	0.38511	0.38876	0.39255	0.39538	0.39752	0.40008	0.40352	0.40688	0.41	0.41286	0.41556	0.41903	0.42221
51	0.32071	0.33275	0.34303	0.35203	0.35895	0.36214	0.36361	0.36483	0.3657	0.36508	0.36559	0.36827	0.37144	0.37233	0.37171	0.37179	0.37386	0.37494	0.37391	0.37204	0.37113	0.36926	0.36641	0.36377	0.36151	0.35811	0.35318	0.34777	0.34315	0.34026	0.33937	0.3402	0.34285	0.34742	0.35332	0.35917	0.36392	0.36765	0.37105	0.37398	0.37639	0.3788	0.38176	0.38481	0.3878	0.39072	0.39357	0.39694	0.4003
52	0.41893	0.43829	0.45429	0.46568	0.47331	0.47941	0.48223	0.48195	0.48131	0.48319	0.48474	0.48582	0.48859	0.49199	0.4947	0.49657	0.4975	0.49621	0.49413	0.49243	0.49023	0.48744	0.48458	0.48202	0.47949	0.47594	0.47012	0.46193	0.45402	0.44831	0.44574	0.44672	0.45162	0.45949	0.46832	0.47562	0.48084	0.48508	0.48941	0.49336	0.4971	0.50105	0.50546	0.50978	0.5136	0.51715	0.5212	0.52554	0.52972
53	0.45065	0.4686	0.48535	0.49925	0.5093	0.51616	0.51984	0.52064	0.51968	0.51926	0.5208	0.52408	0.52777	0.53037	0.53146	0.53241	0.53473	0.5349	0.53203	0.52846	0.52727	0.52574	0.52293	0.51981	0.51756	0.5137	0.50669	0.49766	0.48944	0.48415	0.48259	0.48409	0.48827	0.49531	0.50425	0.51246	0.51883	0.52347	0.52741	0.53211	0.53696	0.54136	0.54591	0.55097	0.5555	0.55921	0.56296	0.56731	0.57183
54	0.47133	0.49081	0.50973	0.52451	0.53366	0.53935	0.54214	0.54284	0.54257	0.54281	0.54415	0.54633	0.54891	0.55194	0.55442	0.55594	0.55686	0.55539	0.55175	0.54824	0.54693	0.54507	0.54168	0.53772	0.53442	0.52987	0.52256	0.51322	0.50453	0.49838	0.49577	0.49661	0.50097	0.50839	0.51735	0.52573	0.53263	0.53748	0.54077	0.54492	0.5494	0.55335	0.55736	0.56212	0.56654	0.57032	0.57431	0.57824	0.58207
55	0.24662	0.25704	0.26745	0.27592	0.28122	0.28549	0.2893	0.29211	0.29406	0.29614	0.29708	0.29779	0.30014	0.30348	0.30588	0.30738	0.30977	0.31124	0.31142	0.31162	0.31283	0.31216	0.31019	0.30911	0.30899	0.30793	0.30477	0.30014	0.29665	0.2957	0.29672	0.29837	0.30147	0.30693	0.31438	0.32159	0.32673	0.33013	0.33343	0.33791	0.34245	0.34603	0.34917	0.35337	0.35788	0.36176	0.36529	0.36939	0.3737
56	0.33293	0.34726	0.35945	0.3686	0.37544	0.38109	0.38491	0.38714	0.38834	0.38935	0.39118	0.39336	0.3952	0.39734	0.39939	0.40119	0.40285	0.40306	0.40141	0.39921	0.39872	0.39873	0.39752	0.3948	0.39231	0.38935	0.38509	0.37971	0.37416	0.37	0.36867	0.37032	0.37407	0.37999	0.38766	0.39536	0.40132	0.40495	0.40744	0.41143	0.41668	0.42152	0.42488	0.42825	0.43233	0.43672	0.44037	0.44391	0.44776
57	0.37807	0.39386	0.40805	0.42039	0.43047	0.43705	0.43761	0.43606	0.43715	0.4393	0.44067	0.44203	0.44471	0.44756	0.44989	0.45105	0.45089	0.4501	0.44936	0.4489	0.44819	0.44659	0.44427	0.44156	0.43827	0.43433	0.42939	0.42329	0.41695	0.41249	0.41112	0.41238	0.41659	0.42363	0.432	0.43937	0.44505	0.44943	0.45355	0.45806	0.46235	0.46611	0.46976	0.47414	0.47884	0.48308	0.48667	0.4908	0.49519
58	0.26514	0.27673	0.28478	0.29014	0.29574	0.30223	0.30454	0.30294	0.30145	0.30249	0.30373	0.30388	0.30381	0.30586	0.30792	0.30737	0.3046	0.30292	0.30368	0.30533	0.30379	0.29981	0.29766	0.29875	0.29782	0.29327	0.28708	0.28271	0.28055	0.27888	0.27719	0.27715	0.28037	0.28529	0.28955	0.2929	0.29715	0.30114	0.3027	0.30303	0.30441	0.30719	0.31003	0.31227	0.3142	0.31642	0.31898	0.32124	0.32317
59	0.45534	0.47082	0.4847	0.49609	0.50551	0.5126	0.51583	0.5159	0.51416	0.51095	0.50819	0.508	0.5104	0.51046	0.50655	0.50188	0.50087	0.50021	0.49741	0.4927	0.48819	0.48314	0.47741	0.47135	0.46524	0.45785	0.44847	0.43817	0.43008	0.42562	0.42398	0.4231	0.42349	0.4252	0.4277	0.43072	0.43494	0.43955	0.44335	0.44625	0.44865	0.45054	0.45155	0.45199	0.45339	0.45645	0.45999	0.46209	0.46239
60	0.45609	0.47105	0.48621	0.49975	0.50928	0.51362	0.51303	0.50944	0.50534	0.5033	0.50311	0.50273	0.50122	0.50085	0.50022	0.4985	0.49667	0.49352	0.48838	0.4827	0.47869	0.47419	0.46811	0.46099	0.45439	0.4475	0.43872	0.42795	0.41877	0.41344	0.41131	0.40975	0.40899	0.4113	0.41705	0.42238	0.42527	0.42709	0.42983	0.43269	0.43476	0.43571	0.43612	0.43763	0.43993	0.44184	0.44302	0.44456	0.44602
61	0.54086	0.5572	0.57399	0.58876	0.59915	0.60453	0.60665	0.60616	0.6033	0.60037	0.5994	0.59955	0.59914	0.59757	0.59412	0.58978	0.58613	0.58236	0.57861	0.57463	0.56911	0.56217	0.55535	0.54919	0.54167	0.53188	0.52054	0.50955	0.50054	0.49466	0.49178	0.49075	0.4909	0.49274	0.49628	0.49988	0.50397	0.50864	0.51299	0.51629	0.51898	0.52077	0.52139	0.52223	0.52401	0.5268	0.53012	0.53269	0.5335
62	0.70189	0.72869	0.75118	0.7687	0.78079	0.78588	0.7841	0.77921	0.77531	0.77339	0.77251	0.77236	0.77322	0.77407	0.77203	0.76662	0.76028	0.75402	0.74696	0.73904	0.73212	0.72467	0.716	0.7069	0.69822	0.68745	0.67365	0.65845	0.64515	0.63477	0.6278	0.62554	0.62806	0.6335	0.64009	0.64676	0.65202	0.65575	0.65849	0.66067	0.66328	0.66628	0.6688	0.67093	0.67312	0.67568	0.6785	0.68106	0.68318
63	0.34235	0.35298	0.36159	0.37015	0.37886	0.38409	0.38484	0.38246	0.37932	0.37818	0.378	0.37736	0.37688	0.37717	0.37613	0.37342	0.3703	0.36717	0.36573	0.36517	0.36158	0.35642	0.35213	0.34888	0.34356	0.33599	0.32819	0.32263	0.31904	0.31583	0.31292	0.31193	0.31302	0.3151	0.31705	0.31877	0.32094	0.32364	0.3263	0.32857	0.33126	0.33363	0.33372	0.33284	0.33372	0.33678	0.33942	0.34058	0.34052
64	0.19404	0.20079	0.20886	0.21422	0.21558	0.21658	0.21745	0.21731	0.21589	0.21392	0.21254	0.21281	0.21415	0.21407	0.21213	0.20923	0.20692	0.20596	0.20501	0.20294	0.2004	0.19868	0.19692	0.19372	0.18995	0.18658	0.18347	0.18001	0.17568	0.17187	0.17031	0.17089	0.17215	0.17334	0.1742	0.17532	0.17687	0.17813	0.17879	0.17926	0.17939	0.17943	0.17955	0.17945	0.17976	0.18071	0.18169	0.18263	0.18313
65	0.59172	0.61165	0.62998	0.64459	0.65479	0.66187	0.66429	0.66175	0.65691	0.65484	0.65395	0.65269	0.65131	0.64933	0.64668	0.64401	0.64113	0.63664	0.63145	0.62579	0.61846	0.61114	0.60424	0.59693	0.58857	0.57809	0.56525	0.5518	0.54145	0.5352	0.53212	0.53056	0.53134	0.53427	0.53801	0.54142	0.54567	0.55054	0.55487	0.55816	0.56041	0.56171	0.56241	0.56389	0.56663	0.56988	0.5724	0.57458	0.57599
66	0.34347	0.35736	0.36785	0.37401	0.37893	0.38502	0.38815	0.38688	0.38314	0.38084	0.38072	0.38119	0.38058	0.37916	0.37834	0.37821	0.37673	0.3732	0.3702	0.36857	0.3653	0.35958	0.35343	0.34933	0.34757	0.34376	0.33604	0.32727	0.32176	0.31929	0.31801	0.3163	0.31568	0.31756	0.32116	0.32382	0.32578	0.32815	0.33163	0.33497	0.33673	0.33709	0.33743	0.33835	0.33995	0.34193	0.34383	0.34583	0.34693
67	0.25965	0.26848	0.27635	0.28174	0.28462	0.28719	0.28912	0.28802	0.28399	0.28233	0.28204	0.28131	0.28014	0.27937	0.27795	0.27613	0.27499	0.27348	0.27108	0.26787	0.26444	0.26097	0.25711	0.253	0.24985	0.24546	0.23936	0.23383	0.23029	0.22756	0.22537	0.2245	0.22472	0.22563	0.22681	0.22842	0.23	0.2311	0.23196	0.23291	0.23313	0.23291	0.23333	0.23415	0.23477	0.23515	0.2361	0.23756	0.23832
68	0.26333	0.272	0.27941	0.28405	0.28628	0.28771	0.28716	0.2862	0.28678	0.28759	0.28741	0.28617	0.28422	0.28229	0.28183	0.282	0.28057	0.27792	0.27526	0.27287	0.2694	0.26585	0.26316	0.26096	0.25777	0.25397	0.24956	0.24446	0.23989	0.23691	0.23539	0.23438	0.23428	0.23573	0.23866	0.24207	0.24479	0.24645	0.24759	0.24903	0.25041	0.25138	0.25205	0.25334	0.25515	0.25686	0.25813	0.25915	0.25989
69	0.32846	0.34003	0.35062	0.35921	0.36432	0.364	0.36255	0.36244	0.3625	0.36014	0.3579	0.35704	0.3567	0.355	0.35259	0.3506	0.34888	0.34661	0.34418	0.34117	0.33596	0.33088	0.32706	0.32341	0.31808	0.31203	0.30594	0.29981	0.29359	0.28837	0.28523	0.28416	0.28439	0.28581	0.28842	0.2918	0.29406	0.29485	0.29558	0.29729	0.29861	0.29923	0.30003	0.30107	0.30202	0.30276	0.30352	0.30411	0.30448
70	0.50194	0.51922	0.53331	0.54481	0.55365	0.55822	0.55842	0.55557	0.55132	0.54665	0.54348	0.54184	0.54018	0.53831	0.53679	0.53503	0.53185	0.52752	0.52181	0.51545	0.51035	0.50467	0.49814	0.492	0.48613	0.47743	0.46596	0.45446	0.44483	0.43786	0.43379	0.43291	0.43429	0.43692	0.44049	0.44516	0.44851	0.45017	0.45173	0.45429	0.45617	0.45677	0.45733	0.45821	0.45925	0.46045	0.46195	0.46355	0.46465
71	0.19524	0.20339	0.21045	0.21586	0.21935	0.22144	0.22264	0.22222	0.22022	0.21913	0.21909	0.219	0.21851	0.21958	0.22111	0.22117	0.21908	0.21664	0.21494	0.21385	0.21231	0.21021	0.20822	0.20673	0.20496	0.20154	0.19687	0.19294	0.191	0.1893	0.18716	0.18642	0.18812	0.1907	0.19275	0.19498	0.19745	0.19951	0.2006	0.20112	0.20141	0.20185	0.2026	0.20302	0.20329	0.20418	0.20614	0.20759	0.20781
72	0.2389	0.25029	0.25964	0.26524	0.268	0.26935	0.26918	0.26794	0.26617	0.26403	0.2628	0.26251	0.26216	0.26163	0.26092	0.25989	0.25869	0.25761	0.25527	0.25142	0.24835	0.24637	0.24437	0.2414	0.2376	0.23329	0.2285	0.2232	0.21935	0.2164	0.21372	0.21297	0.21508	0.21772	0.21941	0.22134	0.22296	0.22425	0.2253	0.22623	0.22672	0.22661	0.22647	0.22749	0.22876	0.2294	0.22998	0.23108	0.23201
73	0.57111	0.59169	0.60732	0.6204	0.63229	0.64006	0.64255	0.6407	0.63676	0.63305	0.63185	0.63262	0.63299	0.63226	0.63131	0.62981	0.62639	0.62244	0.61831	0.61332	0.60689	0.60021	0.59417	0.58886	0.58319	0.57418	0.56183	0.54933	0.53975	0.53256	0.52755	0.52622	0.52916	0.53412	0.53897	0.5441	0.54927	0.5539	0.55761	0.56021	0.56239	0.56478	0.56705	0.56866	0.57101	0.57455	0.57772	0.58041	0.58219
74	0.42907	0.44301	0.45734	0.47048	0.47913	0.48142	0.48207	0.48252	0.48097	0.4755	0.47092	0.47026	0.4721	0.4726	0.47177	0.47046	0.46892	0.46707	0.46352	0.45808	0.45313	0.44928	0.44538	0.44033	0.43435	0.42702	0.41901	0.41141	0.40401	0.39796	0.39452	0.39391	0.39505	0.39756	0.40138	0.40637	0.41066	0.41338	0.41534	0.41795	0.42006	0.421	0.42146	0.42276	0.42495	0.42727	0.42887	0.43047	0.43215
75	0.46216	0.47796	0.4923	0.50401	0.51189	0.51529	0.5171	0.51729	0.51464	0.51069	0.50972	0.5107	0.50967	0.50765	0.5063	0.50531	0.50326	0.50033	0.49615	0.49103	0.48607	0.48048	0.47471	0.46974	0.46496	0.45799	0.44831	0.43767	0.4292	0.42415	0.42166	0.42026	0.42115	0.42433	0.42879	0.43346	0.43757	0.4406	0.4428	0.44498	0.4469	0.44818	0.4489	0.44997	0.45194	0.45452	0.45683	0.45865	0.45987
76	0.54571	0.56494	0.5808	0.59324	0.60197	0.60636	0.60755	0.60624	0.60313	0.59937	0.59577	0.59282	0.59073	0.58989	0.58849	0.58516	0.58059	0.57607	0.57154	0.56625	0.55936	0.55154	0.54491	0.53993	0.53327	0.52341	0.51127	0.49944	0.49061	0.48433	0.47969	0.47754	0.47871	0.48149	0.48465	0.48906	0.49313	0.49636	0.49928	0.50166	0.50279	0.5034	0.50477	0.50634	0.50798	0.50987	0.51221	0.51438	0.51539
77	0.32704	0.33809	0.34823	0.35758	0.36396	0.36689	0.36841	0.36876	0.36862	0.3697	0.36964	0.36884	0.36948	0.37116	0.37227	0.37214	0.37138	0.37036	0.36884	0.36663	0.36421	0.36208	0.36018	0.35795	0.35453	0.34974	0.344	0.33815	0.33408	0.33174	0.33041	0.33043	0.33316	0.33756	0.34249	0.34829	0.35349	0.35697	0.3591	0.36159	0.36431	0.36687	0.36935	0.37202	0.37472	0.37733	0.37994	0.38248	0.3847
78	0.28184	0.29214	0.30296	0.31314	0.31935	0.32063	0.32081	0.32087	0.32026	0.31891	0.31958	0.32286	0.32595	0.32573	0.32598	0.32817	0.32896	0.32659	0.32412	0.32373	0.32328	0.32057	0.31735	0.31611	0.31528	0.31149	0.30529	0.30012	0.29734	0.29503	0.29267	0.29284	0.29624	0.30086	0.30505	0.30931	0.31362	0.31746	0.32018	0.32217	0.32433	0.32681	0.32918	0.33129	0.3333	0.33564	0.33859	0.34156	0.34411
79	0.28014	0.28989	0.29853	0.30608	0.31147	0.31452	0.31692	0.31906	0.32085	0.32232	0.32295	0.32382	0.32611	0.32783	0.32802	0.32812	0.33018	0.33139	0.33038	0.32825	0.32718	0.32626	0.32489	0.32318	0.32183	0.31921	0.3148	0.31005	0.3062	0.30369	0.30282	0.3034	0.30643	0.3124	0.31963	0.32509	0.32945	0.33299	0.33568	0.33807	0.3408	0.34401	0.34754	0.35128	0.35472	0.35761	0.36038	0.36351	0.36665
80	0.31852	0.33425	0.34475	0.35144	0.35697	0.36216	0.3652	0.36586	0.36571	0.36646	0.36798	0.37013	0.37278	0.37539	0.37727	0.37822	0.37868	0.37931	0.37932	0.37822	0.37693	0.37502	0.37262	0.3707	0.36957	0.36643	0.36083	0.35484	0.34976	0.34623	0.34493	0.34643	0.35054	0.35676	0.3641	0.37135	0.37669	0.38	0.38275	0.38613	0.38984	0.39354	0.39703	0.40054	0.40415	0.40755	0.41057	0.41434	0.4186
81	0.29387	0.30781	0.31937	0.32822	0.33481	0.33891	0.33996	0.3404	0.34293	0.34645	0.34789	0.34834	0.35089	0.35431	0.35644	0.35731	0.35879	0.35979	0.36014	0.36001	0.35884	0.35649	0.35487	0.35491	0.35412	0.35128	0.3467	0.34175	0.33803	0.33574	0.33446	0.33442	0.33742	0.34365	0.35164	0.35892	0.36495	0.36986	0.37371	0.37657	0.37956	0.38307	0.38676	0.39079	0.39486	0.39861	0.40214	0.4063	0.41069
82	0.29212	0.30212	0.30945	0.31593	0.32282	0.32884	0.33147	0.3309	0.32931	0.32836	0.32747	0.32701	0.32782	0.32855	0.32891	0.3292	0.32919	0.32777	0.3258	0.32372	0.32058	0.3174	0.3151	0.31345	0.31105	0.3068	0.30117	0.29603	0.29222	0.28922	0.28717	0.28701	0.28884	0.29273	0.29771	0.30158	0.30444	0.30705	0.30957	0.31154	0.31354	0.3155	0.31689	0.31842	0.32044	0.32274	0.32482	0.32681	0.32865
83	0.32655	0.33822	0.34876	0.35741	0.36323	0.3669	0.36963	0.37094	0.37093	0.37173	0.37296	0.37444	0.37629	0.37753	0.37826	0.37902	0.3796	0.37916	0.37798	0.37637	0.37439	0.37298	0.37173	0.36984	0.36753	0.36371	0.35816	0.35234	0.34811	0.34486	0.34273	0.34334	0.34659	0.35167	0.35788	0.36485	0.3697	0.37251	0.37549	0.37886	0.38146	0.38372	0.38685	0.39002	0.39321	0.39633	0.39892	0.40175	0.405
84	0.2952	0.31011	0.32123	0.329	0.33596	0.34188	0.3425	0.33994	0.33903	0.3414	0.34402	0.3447	0.34443	0.34722	0.35073	0.35147	0.34914	0.34752	0.34748	0.34776	0.34643	0.34399	0.34249	0.34236	0.34025	0.33558	0.33001	0.32546	0.32206	0.3189	0.31621	0.31621	0.32068	0.32685	0.33191	0.33692	0.34194	0.3457	0.34772	0.34998	0.35293	0.3562	0.35905	0.36116	0.36352	0.36687	0.37058	0.37354	0.37585
85	0.4467	0.46621	0.48233	0.49464	0.50433	0.5121	0.51514	0.51465	0.51383	0.51391	0.51538	0.51798	0.52081	0.52421	0.52691	0.52766	0.5272	0.5254	0.52205	0.51892	0.51821	0.51697	0.5143	0.51094	0.50778	0.50408	0.49814	0.48936	0.48065	0.47467	0.47237	0.47318	0.47788	0.48553	0.49399	0.50148	0.50782	0.5127	0.51628	0.51994	0.5242	0.52873	0.53292	0.53706	0.54125	0.54543	0.54964	0.55388	0.55782
86	0.32406	0.33907	0.35146	0.36187	0.37061	0.37596	0.37789	0.37967	0.38308	0.3849	0.38547	0.38702	0.39077	0.39352	0.39513	0.39709	0.4	0.40086	0.39975	0.39831	0.3976	0.3975	0.39723	0.39574	0.39269	0.3898	0.38698	0.38263	0.37674	0.37207	0.37089	0.37349	0.37858	0.38511	0.39245	0.40003	0.40668	0.41167	0.41529	0.41969	0.4249	0.42952	0.43282	0.4368	0.44162	0.4465	0.45077	0.4552	0.46005
87	0.30118	0.31477	0.3274	0.33627	0.3409	0.34338	0.34611	0.34798	0.34712	0.34613	0.34763	0.35033	0.35218	0.35414	0.35507	0.3549	0.35471	0.35428	0.35297	0.35083	0.34915	0.34825	0.3473	0.34554	0.34333	0.34076	0.33717	0.33187	0.32609	0.32201	0.32046	0.3207	0.32327	0.3283	0.33476	0.34081	0.34556	0.34873	0.35085	0.35336	0.35629	0.35902	0.3613	0.36383	0.36655	0.36944	0.37285	0.37599	0.37841
[truncated: 1,552 more columns]

## Sheet: SNV
Samples	400	401	402	403	404	405	406	407	408	409	410	411	412	413	414	415	416	417	418	419	420	421	422	423	424	425	426	427	428	429	430	431	432	433	434	435	436	437	438	439	440	441	442	443	444	445	446	447	448
1	3.42665	3.53057	3.63991	3.74419	3.82171	3.86378	3.88223	3.88283	3.868	3.84691	3.83919	3.84727	3.85438	3.83618	3.79784	3.76517	3.75914	3.76011	3.74082	3.69356	3.63991	3.58699	3.53708	3.4909	3.44341	3.37903	3.29838	3.2176	3.15564	3.11899	3.10139	3.09307	3.09548	3.11007	3.13478	3.16155	3.19084	3.22532	3.26185	3.29138	3.31116	3.32333	3.33346	3.34419	3.35745	3.37686	3.40579	3.42797	3.43388
2	3.47233	3.60782	3.71623	3.80284	3.88311	3.95457	3.98573	3.97235	3.94026	3.92394	3.91691	3.90399	3.8828	3.87793	3.87793	3.86417	3.8354	3.81119	3.78513	3.74709	3.70123	3.65228	3.60465	3.56003	3.51456	3.44457	3.35038	3.2596	3.19882	3.16309	3.14028	3.12582	3.13107	3.15319	3.1801	3.20477	3.23972	3.27986	3.31094	3.33383	3.35448	3.36948	3.37242	3.37598	3.39175	3.4199	3.44743	3.46522	3.47102
3	3.45975	3.62845	3.75886	3.84955	3.91994	3.975	3.99282	3.97662	3.94776	3.92785	3.92061	3.91708	3.90804	3.89718	3.89394	3.89079	3.86488	3.8203	3.78544	3.7642	3.72076	3.66589	3.61931	3.58244	3.53338	3.4687	3.38735	3.29533	3.21179	3.15549	3.13187	3.12987	3.14101	3.16721	3.20722	3.24837	3.28819	3.32162	3.34182	3.3502	3.36421	3.38392	3.39374	3.40031	3.41755	3.44498	3.46527	3.47718	3.48471
4	3.60498	3.75005	3.87511	3.97855	4.06488	4.12328	4.13261	4.10549	4.0734	4.05649	4.05447	4.0536	4.04259	4.03521	4.03172	4.01628	3.97587	3.9268	3.88531	3.85383	3.81617	3.76287	3.70433	3.65345	3.60727	3.54296	3.44925	3.34399	3.27209	3.23343	3.20839	3.18684	3.18624	3.20456	3.23074	3.25947	3.29317	3.32654	3.35285	3.37782	3.40118	3.41562	3.41709	3.42031	3.43354	3.45636	3.48221	3.50261	3.50939
5	3.64084	3.77686	3.90495	4.01866	4.1082	4.15468	4.15092	4.12423	4.10347	4.08858	4.07712	4.06902	4.06605	4.06406	4.0522	4.02779	3.99819	3.96642	3.92787	3.88048	3.83024	3.77817	3.72809	3.68236	3.63354	3.56254	3.46718	3.36658	3.28931	3.24112	3.21323	3.19743	3.20062	3.22173	3.25269	3.28309	3.31406	3.34428	3.36983	3.39116	3.41072	3.42549	3.43211	3.43935	3.45327	3.47311	3.49193	3.50762	3.51651
6	3.60602	3.74016	3.87549	3.99528	4.07781	4.1133	4.1097	4.08341	4.05363	4.03666	4.03506	4.03763	4.03254	4.02654	4.01483	3.99214	3.96145	3.92521	3.88361	3.83989	3.79628	3.74987	3.70346	3.65534	3.59453	3.52121	3.43605	3.34409	3.26694	3.21682	3.18996	3.17584	3.17835	3.19824	3.23093	3.26683	3.29952	3.32746	3.35198	3.37559	3.3965	3.41108	3.41862	3.42639	3.43994	3.45966	3.47994	3.4972	3.50629
7	3.59116	3.73428	3.86782	3.97256	4.04425	4.08973	4.09687	4.07403	4.04465	4.03232	4.03125	4.03069	4.02681	4.0169	3.99788	3.97379	3.94886	3.91538	3.87598	3.83507	3.79235	3.74581	3.6946	3.63945	3.58188	3.51406	3.4306	3.33819	3.25985	3.20892	3.18309	3.17009	3.17262	3.19091	3.21945	3.25102	3.28417	3.31579	3.34416	3.37005	3.39126	3.40533	3.41197	3.42086	3.43578	3.45384	3.47163	3.48665	3.49431
8	3.60444	3.73927	3.87294	3.98366	4.05628	4.09883	4.11472	4.10239	4.07005	4.04039	4.02346	4.02367	4.0321	4.0149	3.98359	3.95927	3.94118	3.90727	3.86869	3.83608	3.79922	3.75072	3.69296	3.6337	3.57868	3.50661	3.4124	3.3182	3.25044	3.2055	3.17583	3.15994	3.16254	3.18371	3.21529	3.24516	3.2701	3.29347	3.32128	3.35321	3.37712	3.38726	3.38973	3.39815	3.41521	3.43577	3.45413	3.46995	3.47783
9	3.48818	3.61287	3.72802	3.82736	3.90173	3.94307	3.96412	3.96646	3.94719	3.9152	3.8906	3.88536	3.89415	3.88835	3.86319	3.8341	3.81474	3.78864	3.75768	3.72466	3.68078	3.6299	3.57967	3.53187	3.48229	3.41644	3.32729	3.2316	3.16902	3.13535	3.11402	3.09961	3.09971	3.11654	3.14573	3.17707	3.2055	3.23497	3.26902	3.30166	3.32477	3.33319	3.33038	3.33375	3.35171	3.37949	3.40409	3.42046	3.4242
10	3.63213	3.77375	3.90058	4.01466	4.10359	4.13821	4.14479	4.13575	4.10933	4.0743	4.05615	4.05811	4.06568	4.05902	4.03898	4.01473	3.98656	3.9509	3.91481	3.87802	3.83261	3.78468	3.73086	3.67039	3.61818	3.55175	3.45687	3.3519	3.27867	3.23025	3.1964	3.18372	3.19066	3.21042	3.23901	3.27426	3.30432	3.32779	3.35057	3.37607	3.39815	3.41125	3.41735	3.4233	3.4348	3.45435	3.47838	3.49576	3.50109
11	3.58415	3.69356	3.7991	3.90818	4.00241	4.04764	4.0626	4.05872	4.03966	4.01771	4.00341	3.99365	3.98068	3.95319	3.92326	3.90286	3.88169	3.85264	3.82249	3.78757	3.73724	3.69201	3.64556	3.58647	3.52861	3.46165	3.37407	3.27652	3.21156	3.17165	3.14216	3.12775	3.1426	3.16489	3.17553	3.19182	3.22275	3.2559	3.27996	3.30911	3.3325	3.3417	3.3437	3.35013	3.36676	3.39259	3.41675	3.42906	3.43028
12	3.92815	4.05015	4.16739	4.28986	4.39679	4.45565	4.4593	4.4263	4.386	4.35713	4.3438	4.34063	4.33238	4.29304	4.24512	4.21149	4.18579	4.15565	4.11662	4.06316	3.9932	3.93402	3.88643	3.83344	3.75919	3.66559	3.57025	3.48997	3.41652	3.34338	3.28738	3.27723	3.29626	3.31736	3.33402	3.36654	3.40541	3.43222	3.43968	3.44698	3.45904	3.46966	3.47189	3.47173	3.47585	3.48934	3.5106	3.52709	3.53027
13	3.4415	3.5811	3.7066	3.80534	3.87575	3.92865	3.95358	3.94287	3.90627	3.87113	3.84912	3.84802	3.86091	3.84924	3.82224	3.80485	3.79902	3.77421	3.73688	3.69748	3.64847	3.59229	3.54146	3.50206	3.4584	3.39055	3.30153	3.21349	3.14284	3.09967	3.08228	3.07656	3.08313	3.09979	3.11985	3.14235	3.17701	3.21848	3.25629	3.2856	3.3025	3.30834	3.30713	3.31223	3.33157	3.35905	3.3813	3.40258	3.41669
14	3.52314	3.65979	3.78652	3.87831	3.93658	3.98758	4.01402	4.00817	3.98427	3.96907	3.95453	3.94074	3.93517	3.92846	3.91278	3.89333	3.87803	3.84913	3.80125	3.74535	3.70049	3.66555	3.62249	3.56205	3.5085	3.4526	3.37336	3.27156	3.19365	3.15446	3.14133	3.12972	3.12575	3.14171	3.1775	3.21707	3.25041	3.27496	3.29696	3.32463	3.34626	3.3557	3.36137	3.37431	3.39348	3.41303	3.42757	3.44306	3.45703
15	3.50993	3.65171	3.77145	3.86264	3.93323	3.97825	3.97902	3.95776	3.94314	3.93622	3.92833	3.91534	3.90322	3.89745	3.88899	3.87312	3.85225	3.81416	3.77165	3.73846	3.70413	3.65748	3.60823	3.56399	3.51503	3.44722	3.3544	3.25158	3.17493	3.13713	3.12549	3.11375	3.11202	3.13193	3.16733	3.1984	3.23042	3.26245	3.29121	3.3218	3.34623	3.35633	3.35537	3.36094	3.37739	3.3999	3.42106	3.43866	3.45068
16	3.47393	3.62942	3.76914	3.85355	3.89812	3.94685	3.9801	3.98124	3.94785	3.90214	3.88207	3.89096	3.89884	3.8676	3.82389	3.80469	3.80698	3.77975	3.72572	3.67284	3.64074	3.61208	3.56206	3.49155	3.44383	3.38708	3.29665	3.19619	3.14303	3.11365	3.08169	3.05489	3.04959	3.06908	3.10663	3.14876	3.17656	3.20006	3.23861	3.27544	3.28648	3.28032	3.28677	3.30798	3.33234	3.34882	3.35684	3.37418	3.39582
17	3.63337	3.82221	3.99201	4.09385	4.13379	4.16955	4.19486	4.16161	4.06771	4.01376	4.01209	4.02421	4.01439	3.98762	3.95688	3.94349	3.9483	3.9046	3.83015	3.77243	3.7396	3.70113	3.64341	3.57273	3.52609	3.48971	3.41923	3.30359	3.20823	3.16202	3.1478	3.11747	3.09761	3.12584	3.19066	3.22956	3.24775	3.2626	3.28561	3.30631	3.31091	3.30401	3.3038	3.32325	3.35566	3.38096	3.38473	3.39037	3.40585
18	3.5533	3.68281	3.81997	3.93172	3.99475	4.02052	4.01571	4.0019	3.99462	3.98081	3.95935	3.94417	3.9427	3.93455	3.91359	3.88423	3.85648	3.83428	3.80467	3.75805	3.70267	3.65049	3.60597	3.56255	3.50236	3.42391	3.33881	3.25962	3.19388	3.14664	3.11926	3.11358	3.12148	3.13702	3.16267	3.20116	3.23335	3.26036	3.29243	3.32228	3.33844	3.34251	3.34547	3.35114	3.36483	3.38814	3.41664	3.43526	3.43773
19	3.51025	3.64505	3.77118	3.87077	3.93358	3.9675	3.98201	3.97955	3.95935	3.92296	3.90288	3.90094	3.88981	3.87439	3.86416	3.84914	3.82001	3.80045	3.77352	3.72275	3.65839	3.60659	3.57435	3.54482	3.49017	3.41998	3.34578	3.26964	3.19129	3.1312	3.09961	3.08575	3.0895	3.10828	3.13846	3.18054	3.22095	3.24697	3.26485	3.29903	3.32649	3.33257	3.3305	3.3397	3.35653	3.37388	3.39409	3.41092	3.41998
20	3.74382	3.88026	3.99613	4.09412	4.16663	4.19886	4.19603	4.18072	4.17175	4.16204	4.1437	4.12292	4.10923	4.10033	4.08286	4.05049	4.01447	3.99147	3.96396	3.91459	3.8526	3.7942	3.74348	3.69485	3.64056	3.56772	3.47572	3.37894	3.29875	3.24466	3.2137	3.19644	3.19839	3.21755	3.24662	3.28074	3.31635	3.34434	3.36168	3.38265	3.40302	3.41536	3.42008	3.42885	3.44376	3.4621	3.48065	3.49501	3.50115
21	3.74004	3.87211	3.99931	4.10212	4.16407	4.18689	4.18972	4.18933	4.18991	4.18367	4.16758	4.1429	4.11676	4.0991	4.08037	4.05199	4.01814	3.99092	3.96546	3.92771	3.8647	3.79759	3.74686	3.70687	3.64122	3.55899	3.47598	3.39668	3.31688	3.25524	3.22285	3.21183	3.21485	3.22939	3.25426	3.28723	3.32001	3.3481	3.37385	3.40009	3.41833	3.42409	3.42262	3.4313	3.44925	3.46759	3.48408	3.49832	3.50378
22	3.60153	3.75249	3.90105	3.98369	3.99622	4.01203	4.02277	4.02158	4.00607	3.97623	3.95088	3.947	3.9643	3.98847	3.96669	3.90105	3.86645	3.87003	3.84467	3.76203	3.67015	3.59735	3.55678	3.52844	3.47444	3.39419	3.30618	3.23458	3.18774	3.13583	3.08303	3.07945	3.1048	3.12867	3.15343	3.20683	3.24114	3.25248	3.2665	3.285	3.29574	3.30379	3.31871	3.31244	3.29574	3.29544	3.31752	3.33571	3.34108
23	4.10304	4.26147	4.39405	4.48878	4.53899	4.55198	4.54618	4.51931	4.46986	4.4247	4.40351	4.3948	4.3774	4.36516	4.35028	4.31559	4.25706	4.20117	4.15337	4.1048	4.04324	3.97172	3.906	3.85264	3.78995	3.70594	3.60565	3.50537	3.42439	3.36207	3.31502	3.29156	3.29799	3.32108	3.34984	3.3868	3.41165	3.42376	3.437	3.44936	3.45353	3.45529	3.46463	3.47409	3.4809	3.48443	3.48557	3.49074	3.49869
24	3.2276	3.35169	3.46639	3.57021	3.64181	3.66324	3.67553	3.67193	3.63555	3.59732	3.59326	3.61308	3.62339	3.61945	3.6103	3.60497	3.60218	3.58515	3.54692	3.50057	3.47184	3.44113	3.39595	3.34659	3.3116	3.26155	3.18485	3.1005	3.03886	3.00329	2.98649	2.98533	2.99946	3.02542	3.06006	3.10142	3.14001	3.17395	3.20582	3.22992	3.24695	3.26201	3.27858	3.29445	3.31148	3.33002	3.34798	3.3715	3.39491
25	3.7536	3.89088	4.00998	4.11104	4.19171	4.23205	4.22427	4.20022	4.17969	4.1285	4.08493	4.08273	4.11075	4.11324	4.09755	4.07628	4.04416	3.99576	3.94061	3.8881	3.83808	3.79071	3.73952	3.68026	3.62291	3.56468	3.48958	3.39014	3.29656	3.23467	3.20782	3.19917	3.20064	3.2175	3.25579	3.31064	3.35068	3.37034	3.38633	3.4029	3.40877	3.40906	3.41771	3.4271	3.4362	3.44705	3.46157	3.4758	3.48474
26	3.19568	3.34857	3.4829	3.57821	3.63825	3.67609	3.69618	3.69256	3.66289	3.62949	3.61407	3.61302	3.61395	3.62155	3.62587	3.62038	3.60811	3.59223	3.56688	3.53137	3.4968	3.46374	3.42204	3.36866	3.32089	3.26576	3.19462	3.11952	3.06264	3.01708	2.98695	2.9929	3.02024	3.05014	3.07992	3.12092	3.1625	3.19673	3.22207	3.2431	3.26331	3.27907	3.28585	3.29543	3.31213	3.33315	3.355	3.37964	3.39775
27	3.76209	3.91008	4.03616	4.13365	4.18824	4.19307	4.19585	4.19214	4.15221	4.08091	4.04693	4.06234	4.08221	4.07163	4.04879	4.02725	3.99754	3.96077	3.93032	3.90414	3.85846	3.78233	3.70601	3.65959	3.62226	3.55282	3.44957	3.34596	3.2767	3.23325	3.19834	3.17587	3.18738	3.22155	3.2637	3.31867	3.35729	3.3727	3.38124	3.38403	3.38013	3.38737	3.41597	3.42414	3.41652	3.41745	3.43881	3.46313	3.47817
28	3.33151	3.4824	3.60233	3.68733	3.74399	3.7818	3.80639	3.80227	3.76371	3.7179	3.70205	3.71665	3.72938	3.72439	3.70854	3.69182	3.68071	3.66374	3.6263	3.57725	3.54492	3.51697	3.47865	3.42611	3.36895	3.30268	3.22692	3.15116	3.09013	3.04758	3.02598	3.02885	3.0447	3.0658	3.09538	3.1418	3.18673	3.21743	3.23653	3.25662	3.27509	3.28807	3.29756	3.30742	3.32252	3.34436	3.36708	3.3858	3.39915
29	3.56161	3.69684	3.81135	3.89978	3.95967	4.00022	4.02408	4.01823	3.98336	3.95333	3.9405	3.93729	3.93063	3.92248	3.90521	3.87732	3.84952	3.83019	3.80214	3.75681	3.71124	3.66509	3.61343	3.55963	3.51899	3.45862	3.36648	3.26909	3.20385	3.1605	3.12908	3.11896	3.13179	3.15771	3.18748	3.22039	3.24992	3.27558	3.30076	3.32404	3.34279	3.35727	3.36895	3.3803	3.3961	3.41551	3.43089	3.44471	3.45672
30	3.3701	3.50988	3.62906	3.73226	3.80978	3.84017	3.84961	3.85335	3.84857	3.82877	3.81394	3.81247	3.81836	3.82289	3.81664	3.80101	3.78649	3.76504	3.73109	3.69047	3.6537	3.61056	3.56141	3.51441	3.47611	3.42206	3.33989	3.24668	3.17848	3.13197	3.10022	3.09079	3.10739	3.13889	3.17547	3.21806	3.25863	3.28994	3.31084	3.32953	3.34883	3.36648	3.38009	3.39393	3.41177	3.43285	3.45099	3.46612	3.47991
31	3.17906	3.34368	3.46717	3.54539	3.59376	3.63013	3.65742	3.66434	3.64811	3.62817	3.62311	3.63272	3.64047	3.64295	3.63706	3.62166	3.60451	3.58818	3.55986	3.52132	3.49393	3.46117	3.41953	3.37757	3.33779	3.27888	3.20107	3.12522	3.06972	3.02849	2.9978	2.99015	3.01309	3.04998	3.08636	3.12832	3.171	3.20685	3.23269	3.25088	3.2641	3.27764	3.295	3.31267	3.33138	3.35101	3.36858	3.38946	3.40961
32	3.45051	3.59111	3.71565	3.81346	3.88048	3.92504	3.94457	3.93516	3.9056	3.87853	3.86344	3.8653	3.87675	3.86938	3.84897	3.82767	3.80494	3.78462	3.76464	3.73367	3.68511	3.63683	3.59085	3.54345	3.49924	3.4388	3.35296	3.25736	3.18724	3.14268	3.11446	3.10238	3.11605	3.14943	3.19008	3.22985	3.26668	3.29988	3.32784	3.34666	3.35669	3.36379	3.37533	3.39104	3.40746	3.42371	3.44323	3.46534	3.48167
33	3.27533	3.41815	3.53303	3.62211	3.68844	3.72779	3.74144	3.72874	3.70029	3.68167	3.68442	3.69859	3.70526	3.70663	3.70156	3.68304	3.6493	3.62507	3.60349	3.5689	3.5215	3.48025	3.44692	3.41265	3.37181	3.30897	3.22551	3.14299	3.081	3.03921	3.01583	3.01234	3.02609	3.05614	3.09919	3.1487	3.18647	3.20847	3.2272	3.2528	3.27057	3.28041	3.2985	3.32495	3.34441	3.35351	3.36949	3.39382	3.41339
34	3.30684	3.44455	3.55506	3.65059	3.73602	3.78776	3.79658	3.77948	3.76035	3.75015	3.74271	3.72985	3.71402	3.71583	3.71987	3.7051	3.67035	3.64219	3.62455	3.60458	3.56675	3.51564	3.46878	3.43467	3.39387	3.32523	3.23788	3.16159	3.10687	3.0615	3.0259	3.01952	3.04141	3.07361	3.10474	3.143	3.18305	3.21514	3.23576	3.25446	3.27497	3.2925	3.29994	3.30684	3.32331	3.3486	3.37272	3.39174	3.40492
35	3.04364	3.18681	3.30288	3.3708	3.4133	3.47288	3.51615	3.52308	3.50177	3.47403	3.46274	3.47159	3.47891	3.46389	3.45208	3.44656	3.41972	3.38531	3.36631	3.35783	3.32304	3.28272	3.25075	3.21929	3.17243	3.11978	3.05905	2.98663	2.92744	2.88982	2.8712	2.87107	2.88995	2.91961	2.95659	3.00397	3.04467	3.07561	3.10553	3.13699	3.15881	3.17153	3.18758	3.20375	3.21878	3.23624	3.25678	3.27977	3.30224
36	3.74477	3.89955	4.05404	4.167	4.22138	4.24484	4.2544	4.24528	4.21331	4.16953	4.13592	4.12934	4.13995	4.13054	4.10185	4.06958	4.04538	4.01549	3.97187	3.91957	3.86833	3.81663	3.7606	3.69815	3.63734	3.57534	3.49361	3.38395	3.29102	3.23857	3.21915	3.21153	3.21975	3.23738	3.26248	3.3085	3.35078	3.37035	3.37588	3.39306	3.41024	3.41801	3.41786	3.41891	3.43056	3.45163	3.47016	3.48256	3.48719
37	3.03247	3.15245	3.28437	3.40556	3.47769	3.4966	3.48659	3.46888	3.45492	3.44086	3.4357	3.44633	3.46271	3.46575	3.46605	3.46494	3.45108	3.44167	3.43065	3.40111	3.35154	3.31431	3.29438	3.27233	3.22347	3.1567	3.09266	3.04026	2.9821	2.92747	2.89439	2.89236	2.92018	2.96803	3.02195	3.07304	3.11634	3.14476	3.15893	3.17562	3.20081	3.22974	3.25402	3.27506	3.29286	3.30854	3.32655	3.35042	3.37531
38	2.55829	2.66275	2.77583	2.87838	2.93365	2.94228	2.95521	2.97308	2.97726	2.97219	2.97194	2.98005	2.98867	3.0011	3.01225	3.00921	2.98855	2.97993	2.97219	2.95153	2.9353	2.9263	2.91236	2.88827	2.86089	2.8188	2.76568	2.71396	2.66338	2.62915	2.62002	2.62928	2.6578	2.70344	2.75757	2.81132	2.86165	2.89778	2.91717	2.94367	2.98056	3.01339	3.02797	3.04775	3.07906	3.11126	3.13332	3.15791	3.18707
39	2.93715	3.03469	3.15094	3.26191	3.32513	3.33761	3.34398	3.35144	3.35117	3.35158	3.35796	3.36189	3.35172	3.33706	3.33096	3.33069	3.32119	3.30491	3.28836	3.26978	3.23749	3.20439	3.18092	3.16003	3.11744	3.0587	2.99521	2.93417	2.87746	2.83297	2.81153	2.82157	2.84965	2.88194	2.91979	2.9769	3.02926	3.06046	3.07688	3.10035	3.12802	3.15122	3.16614	3.18771	3.21579	3.24116	3.25947	3.2809	3.30437
40	2.32888	2.45546	2.56647	2.6512	2.70653	2.74263	2.75638	2.76003	2.77151	2.78769	2.7997	2.81205	2.82884	2.84511	2.86451	2.87765	2.87121	2.86564	2.86382	2.85729	2.84198	2.82397	2.80614	2.78839	2.76795	2.73184	2.68313	2.63754	2.60065	2.56942	2.54872	2.55194	2.58282	2.63432	2.69417	2.75107	2.79735	2.83406	2.86773	2.90192	2.93637	2.96934	2.99814	3.02415	3.05251	3.08409	3.11306	3.14411	3.17665
41	2.14624	2.27218	2.3759	2.43436	2.46435	2.49951	2.51587	2.52309	2.53277	2.52786	2.52963	2.55798	2.60596	2.62722	2.62667	2.6373	2.67737	2.67519	2.63908	2.61686	2.62245	2.61264	2.5926	2.58102	2.56807	2.54026	2.49311	2.43995	2.40643	2.39211	2.3883	2.39198	2.41787	2.46885	2.53181	2.58415	2.62763	2.66851	2.70736	2.73734	2.75956	2.78191	2.81271	2.84569	2.87609	2.90539	2.93728	2.96904	3.00025
42	1.90232	1.99299	2.07815	2.16541	2.24138	2.28461	2.29126	2.28811	2.30387	2.3261	2.34062	2.35629	2.38412	2.41265	2.43987	2.46184	2.47462	2.47908	2.47567	2.47024	2.47094	2.46814	2.46018	2.45318	2.44941	2.42569	2.38263	2.3443	2.31612	2.29319	2.28514	2.30947	2.34999	2.39777	2.4523	2.51321	2.56398	2.60161	2.63504	2.66786	2.69893	2.73044	2.76405	2.79836	2.83477	2.87144	2.90382	2.93926	2.97786
43	2.08723	2.20945	2.30585	2.3771	2.43038	2.47007	2.49231	2.5054	2.51917	2.532	2.54149	2.55389	2.57665	2.60402	2.62112	2.62737	2.63831	2.65209	2.65457	2.64174	2.62745	2.61787	2.61471	2.61274	2.6	2.56784	2.5219	2.47674	2.44073	2.41807	2.41182	2.42337	2.45613	2.5095	2.57476	2.63797	2.68972	2.72693	2.75507	2.78517	2.81879	2.85266	2.88431	2.91655	2.95077	2.98532	3.01714	3.05007	3.08505
44	2.14538	2.24539	2.33485	2.4159	2.47644	2.50438	2.52668	2.55046	2.56361	2.56084	2.56974	2.59793	2.63249	2.65986	2.67636	2.68813	2.70104	2.70063	2.69221	2.68796	2.68854	2.67546	2.65512	2.64368	2.6409	2.61966	2.57056	2.51247	2.47317	2.4525	2.44482	2.45283	2.48877	2.54678	2.61035	2.66566	2.71027	2.74973	2.79017	2.82416	2.85055	2.87759	2.91273	2.94998	2.9843	3.01428	3.04467	3.08136	3.11878
45	2.18687	2.29909	2.40827	2.49778	2.5536	2.57432	2.58577	2.60233	2.61898	2.62503	2.63024	2.64812	2.68417	2.71359	2.72551	2.73441	2.75513	2.75068	2.72391	2.70404	2.71492	2.71785	2.69637	2.66808	2.66297	2.64197	2.58965	2.53373	2.50459	2.49011	2.48103	2.48557	2.51131	2.56211	2.62844	2.68568	2.72996	2.76733	2.80177	2.83054	2.85958	2.89213	2.92695	2.96016	2.99025	3.01986	3.05269	3.08704	3.11854
46	2.0914	2.19832	2.30028	2.38087	2.4313	2.46796	2.48634	2.49266	2.50206	2.51916	2.52898	2.5424	2.57684	2.60915	2.62599	2.63325	2.64274	2.64684	2.64564	2.64043	2.63103	2.62009	2.61317	2.61146	2.60351	2.57599	2.53249	2.4883	2.45061	2.42651	2.42019	2.43061	2.46343	2.51779	2.58308	2.64701	2.6959	2.73111	2.767	2.80444	2.83333	2.85845	2.89178	2.93135	2.9699	2.9999	3.02408	3.0575	3.09784
47	2.57106	2.69055	2.77617	2.85726	2.93994	2.98899	3.0033	2.9989	2.99596	3.00293	3.0137	3.03094	3.05761	3.06604	3.04904	3.03853	3.07057	3.09087	3.07033	3.02678	3.00134	2.97077	2.94178	2.93419	2.93578	2.89836	2.82253	2.75171	2.70817	2.6848	2.67159	2.66927	2.68909	2.7407	2.81421	2.87757	2.91597	2.94141	2.97248	3.00269	3.02862	3.05222	3.07656	3.10139	3.12867	3.15545	3.17478	3.19961	3.23104
48	2.38824	2.48381	2.57881	2.66491	2.72299	2.75447	2.76754	2.77518	2.78988	2.80827	2.81464	2.82262	2.8512	2.87111	2.86821	2.8615	2.87921	2.8917	2.88441	2.86544	2.85213	2.8291	2.80642	2.80052	2.79786	2.76465	2.70529	2.65148	2.60381	2.56655	2.55278	2.57152	2.60682	2.65461	2.71374	2.77483	2.81718	2.84287	2.87041	2.90304	2.92896	2.95234	2.98636	3.02419	3.05555	3.078	3.1023	3.13481	3.16802
49	2.51552	2.60716	2.69341	2.7808	2.85253	2.88659	2.89986	2.91476	2.93591	2.94004	2.93241	2.93729	2.96846	2.99463	2.99676	2.98649	2.99087	2.99225	2.9761	2.95344	2.95332	2.95056	2.9254	2.88483	2.86255	2.83526	2.78481	2.72208	2.67063	2.63996	2.6327	2.64409	2.67038	2.71958	2.78581	2.84102	2.87695	2.90549	2.93967	2.96696	2.98561	3.00765	3.0427	3.07375	3.09478	3.11269	3.14073	3.18179	3.2201
50	2.59987	2.70528	2.79883	2.88217	2.94983	2.98685	2.99916	3.00627	3.01649	3.01877	3.02706	3.04603	3.06846	3.07621	3.07375	3.07712	3.09235	3.09509	3.08068	3.05925	3.04266	3.01849	2.98877	2.96716	2.95713	2.92494	2.86193	2.79227	2.74449	2.72014	2.7102	2.70938	2.73108	2.77941	2.84187	2.89594	2.93588	2.96916	3.00372	3.02953	3.04904	3.07238	3.10375	3.13439	3.16283	3.18891	3.21353	3.24517	3.27417
51	2.47706	2.59149	2.68919	2.77472	2.84049	2.87081	2.88478	2.89637	2.90464	2.89875	2.90359	2.92906	2.95919	2.96765	2.96176	2.96252	2.98219	2.99246	2.98267	2.96489	2.95625	2.93847	2.91139	2.8863	2.86482	2.8325	2.78565	2.73423	2.69033	2.66286	2.6544	2.66229	2.68748	2.73091	2.78698	2.84258	2.88772	2.92317	2.95548	2.98333	3.00624	3.02914	3.05727	3.08626	3.11467	3.14243	3.16951	3.20154	3.23347
52	2.47937	2.61948	2.73528	2.81772	2.87294	2.91709	2.9375	2.93547	2.93084	2.94444	2.95566	2.96348	2.98353	3.00813	3.02775	3.04128	3.04801	3.03868	3.02362	3.01132	2.9954	2.9752	2.9545	2.93598	2.91767	2.89197	2.84985	2.79058	2.73333	2.692	2.6734	2.68049	2.71596	2.77292	2.83682	2.88966	2.92744	2.95812	2.98946	3.01805	3.04512	3.0737	3.10562	3.13689	3.16453	3.19023	3.21954	3.25095	3.2812
53	2.4523	2.57151	2.68276	2.77508	2.84182	2.88738	2.91183	2.91714	2.91076	2.90797	2.9182	2.93999	2.96449	2.98176	2.989	2.99531	3.01072	3.01185	2.99279	2.96908	2.96117	2.95101	2.93235	2.91163	2.89668	2.87105	2.82449	2.76452	2.70992	2.67479	2.66443	2.67439	2.70215	2.74891	2.80828	2.86281	2.90512	2.93593	2.9621	2.99332	3.02553	3.05475	3.08497	3.11858	3.14866	3.1733	3.19821	3.2271	3.25712
54	2.56288	2.69201	2.81743	2.9154	2.97606	3.01377	3.03227	3.03691	3.03512	3.03671	3.04559	3.06004	3.07714	3.09723	3.11367	3.12374	3.12984	3.1201	3.09597	3.0727	3.06402	3.05169	3.02922	3.00297	2.98109	2.95093	2.90248	2.84056	2.78296	2.74219	2.72489	2.73046	2.75936	2.80855	2.86794	2.92349	2.96923	3.00138	3.02319	3.0507	3.08039	3.10658	3.13316	3.16471	3.19401	3.21907	3.24552	3.27157	3.29696
55	1.71139	1.80873	1.90598	1.98511	2.03462	2.07451	2.1101	2.13635	2.15457	2.174	2.18278	2.18942	2.21137	2.24257	2.26499	2.279	2.30133	2.31506	2.31675	2.31861	2.32992	2.32366	2.30526	2.29517	2.29405	2.28414	2.25462	2.21137	2.17877	2.16989	2.17942	2.19483	2.22379	2.2748	2.3444	2.41175	2.45977	2.49153	2.52236	2.56421	2.60663	2.64007	2.6694	2.70864	2.75077	2.78702	2.82	2.8583	2.89856
56	2.1957	2.31513	2.41673	2.49299	2.54999	2.59708	2.62892	2.64751	2.65751	2.66592	2.68118	2.69934	2.71468	2.73252	2.7496	2.7646	2.77844	2.78019	2.76644	2.7481	2.74402	2.7441	2.73402	2.71135	2.69059	2.66592	2.63042	2.58558	2.53932	2.50465	2.49357	2.50732	2.53857	2.58791	2.65184	2.71601	2.76569	2.79594	2.81669	2.84995	2.8937	2.93404	2.96204	2.99013	3.02414	3.06072	3.09114	3.12065	3.15274
57	2.31521	2.43504	2.54272	2.63637	2.71286	2.7628	2.76705	2.75529	2.76356	2.77987	2.79027	2.80059	2.82093	2.84256	2.86024	2.86904	2.86783	2.86183	2.85622	2.85273	2.84734	2.8352	2.81759	2.79702	2.77206	2.74216	2.70467	2.65838	2.61026	2.57642	2.56602	2.57558	2.60753	2.66096	2.72448	2.78041	2.82351	2.85675	2.88802	2.92224	2.9548	2.98333	3.01103	3.04427	3.07994	3.11212	3.13936	3.1707	3.20402
58	2.5599	2.6968	2.79189	2.8552	2.92134	2.998	3.02529	3.00639	2.98879	3.00107	3.01572	3.01749	3.01667	3.04088	3.06521	3.05872	3.026	3.00615	3.01513	3.03462	3.01643	2.96942	2.94402	2.9569	2.94591	2.89217	2.81905	2.76744	2.74192	2.7222	2.70223	2.70176	2.7398	2.79791	2.84823	2.8878	2.938	2.98513	3.00355	3.00745	3.02375	3.05659	3.09013	3.11659	3.13939	3.16561	3.19585	3.22254	3.24534
59	3.39109	3.52694	3.64874	3.74869	3.83136	3.89358	3.92192	3.92254	3.90727	3.8791	3.85488	3.85321	3.87427	3.8748	3.84049	3.7995	3.79064	3.78485	3.76028	3.71894	3.67937	3.63505	3.58477	3.53159	3.47797	3.41312	3.3308	3.24041	3.16942	3.13028	3.11589	3.10817	3.11159	3.1266	3.14853	3.17504	3.21207	3.25252	3.28587	3.31132	3.33238	3.34897	3.35783	3.36169	3.37398	3.40083	3.4319	3.45033	3.45296
60	3.59091	3.7282	3.86733	3.99159	4.07904	4.11887	4.11346	4.08051	4.04289	4.02417	4.02242	4.01893	4.00508	4.00168	3.9959	3.98011	3.96332	3.93441	3.88724	3.83512	3.79832	3.75702	3.70122	3.63588	3.57531	3.51208	3.43151	3.33267	3.24842	3.19951	3.17996	3.16565	3.15867	3.17987	3.23264	3.28155	3.30807	3.32478	3.34992	3.37617	3.39517	3.40388	3.40765	3.4215	3.44261	3.46014	3.47097	3.4851	3.4985
61	3.54691	3.67153	3.79958	3.91223	3.99147	4.0325	4.04867	4.04493	4.02312	4.00077	3.99338	3.99452	3.99139	3.97942	3.95311	3.92001	3.89217	3.86342	3.83482	3.80446	3.76236	3.70944	3.65742	3.61044	3.55309	3.47842	3.39194	3.30812	3.23941	3.19456	3.1726	3.16474	3.16588	3.17992	3.20692	3.23437	3.26556	3.30118	3.33436	3.35952	3.38004	3.39369	3.39842	3.40483	3.4184	3.43968	3.465	3.4846	3.49078
62	3.61339	3.77387	3.90854	4.01345	4.08585	4.11633	4.10567	4.07639	4.05303	4.04154	4.03627	4.03537	4.04052	4.04561	4.03339	4.001	3.96303	3.92555	3.88327	3.83585	3.79441	3.7498	3.69788	3.64339	3.59141	3.52692	3.44428	3.35326	3.27362	3.21147	3.16973	3.1562	3.17128	3.20386	3.24332	3.28326	3.31476	3.3371	3.3535	3.36656	3.38219	3.40015	3.41524	3.428	3.44111	3.45644	3.47333	3.48865	3.50135
63	3.39991	3.52432	3.62509	3.72528	3.82721	3.88842	3.8972	3.86935	3.8326	3.81926	3.81715	3.80966	3.80404	3.80744	3.79526	3.76355	3.72703	3.6904	3.67354	3.66699	3.62497	3.56458	3.51437	3.47634	3.41407	3.32548	3.23419	3.16912	3.1271	3.08953	3.05547	3.04389	3.05664	3.08099	3.10381	3.12394	3.14934	3.18094	3.21207	3.23864	3.27012	3.29786	3.29891	3.28861	3.29891	3.33472	3.36562	3.3792	3.37849
64	3.74058	3.89334	4.07596	4.19727	4.22804	4.25067	4.27036	4.26719	4.23506	4.19048	4.15925	4.16536	4.19568	4.19387	4.14997	4.08434	4.03206	4.01034	3.98884	3.94199	3.88451	3.84558	3.80575	3.73334	3.64802	3.57175	3.50137	3.42307	3.32508	3.23885	3.20355	3.21668	3.24519	3.27212	3.29158	3.31693	3.35201	3.38052	3.39546	3.4061	3.40904	3.40994	3.41266	3.4104	3.41741	3.43891	3.46109	3.48236	3.49368
65	3.59958	3.74004	3.86923	3.9722	4.04409	4.09399	4.11105	4.09315	4.05903	4.04444	4.03817	4.02929	4.01957	4.00561	3.98693	3.96812	3.94782	3.91617	3.87959	3.8397	3.78804	3.73645	3.68782	3.6363	3.57737	3.50351	3.41302	3.31822	3.24527	3.20122	3.17952	3.16852	3.17402	3.19467	3.22103	3.24506	3.27502	3.30934	3.33986	3.36305	3.3789	3.38807	3.393	3.40343	3.42274	3.44565	3.46341	3.47877	3.48871
66	3.38711	3.548	3.66951	3.74087	3.79786	3.8684	3.90465	3.88994	3.84662	3.81998	3.81859	3.82403	3.81697	3.80052	3.79102	3.78952	3.77237	3.73148	3.69673	3.67785	3.63997	3.57372	3.50248	3.45499	3.4346	3.39047	3.30105	3.19946	3.13563	3.10702	3.0922	3.07239	3.06521	3.08699	3.12868	3.1595	3.1822	3.20965	3.24996	3.28865	3.30904	3.31321	3.31715	3.3278	3.34634	3.36927	3.39128	3.41445	3.42719
67	3.89213	4.04437	4.18005	4.27298	4.32263	4.36694	4.40022	4.38125	4.31177	4.28315	4.27815	4.26557	4.24539	4.23212	4.20764	4.17626	4.1566	4.13057	4.08919	4.03385	3.97471	3.91489	3.84834	3.77748	3.72317	3.64749	3.54232	3.44698	3.38594	3.33888	3.30112	3.28612	3.28991	3.3056	3.32595	3.3537	3.38094	3.39991	3.41474	3.43112	3.43491	3.43112	3.43836	3.45249	3.46318	3.46973	3.48611	3.51128	3.52439
68	3.30381	3.43292	3.54327	3.61236	3.64557	3.66686	3.65867	3.64438	3.65302	3.66508	3.6624	3.64393	3.61489	3.58615	3.5793	3.58183	3.56054	3.52108	3.48147	3.44587	3.3942	3.34134	3.30128	3.26852	3.22101	3.16442	3.09875	3.02281	2.95475	2.91038	2.88774	2.8727	2.87121	2.8928	2.93644	2.98722	3.02772	3.05244	3.06942	3.09086	3.11141	3.12586	3.13583	3.15504	3.182	3.20746	3.22637	3.24156	3.25258
69	3.82663	3.98198	4.12418	4.23952	4.30813	4.30384	4.28437	4.28289	4.2837	4.25201	4.22193	4.21038	4.20582	4.18299	4.15063	4.12391	4.10082	4.07034	4.03771	3.99729	3.92733	3.85912	3.80783	3.75882	3.68725	3.60602	3.52425	3.44194	3.35842	3.28833	3.24617	3.2318	3.23489	3.25395	3.289	3.33438	3.36473	3.37534	3.38514	3.4081	3.42582	3.43415	3.44489	3.45885	3.47161	3.48155	3.49175	3.49967	3.50464
70	3.82932	3.98036	4.10351	4.20403	4.28129	4.32124	4.32299	4.29808	4.26093	4.22011	4.1924	4.17807	4.16356	4.14721	4.13393	4.11855	4.09075	4.0529	4.003	3.94741	3.90283	3.85318	3.79611	3.74244	3.69113	3.61509	3.51484	3.41432	3.33015	3.26923	3.23365	3.22596	3.23802	3.26101	3.29221	3.33303	3.36231	3.37682	3.39046	3.41283	3.42927	3.43451	3.4394	3.4471	3.45619	3.46667	3.47979	3.49377	3.50339
71	3.1173	3.27403	3.40979	3.51383	3.58094	3.62113	3.64421	3.63613	3.59767	3.57671	3.57594	3.57421	3.56479	3.58536	3.61478	3.61594	3.57575	3.52883	3.49613	3.47517	3.44556	3.40518	3.36691	3.33826	3.30422	3.23845	3.14865	3.07307	3.03577	3.00308	2.96193	2.9477	2.98039	3.03	3.06942	3.1123	3.1598	3.19942	3.22038	3.23038	3.23595	3.24441	3.25884	3.26691	3.27211	3.28922	3.32691	3.35479	3.35902
72	3.59695	3.79733	3.96182	4.06034	4.10889	4.13264	4.12965	4.10784	4.0767	4.03905	4.01741	4.01231	4.00615	3.99683	3.98434	3.96622	3.94511	3.92611	3.88494	3.81721	3.7632	3.72837	3.69318	3.64093	3.57408	3.49826	3.41399	3.32075	3.25301	3.20112	3.15397	3.14077	3.17789	3.22434	3.25407	3.28802	3.31652	3.33922	3.35769	3.37405	3.38267	3.38074	3.37827	3.39622	3.41856	3.42982	3.44002	3.45938	3.47574
73	3.38661	3.52936	3.63777	3.7285	3.81097	3.86487	3.88214	3.86931	3.84198	3.81625	3.80792	3.81326	3.81583	3.81077	3.80418	3.79377	3.77005	3.74265	3.714	3.67939	3.63479	3.58846	3.54656	3.50973	3.4704	3.4079	3.32224	3.23553	3.16908	3.11921	3.08446	3.07524	3.09563	3.13003	3.16367	3.19926	3.23512	3.26723	3.29297	3.311	3.32612	3.3427	3.35845	3.36961	3.38591	3.41047	3.43246	3.45112	3.46346
74	3.42096	3.55087	3.68441	3.80687	3.88748	3.90882	3.91488	3.91907	3.90463	3.85365	3.81097	3.80482	3.82197	3.82663	3.81889	3.80668	3.79233	3.77509	3.74201	3.69131	3.64518	3.6093	3.57296	3.52589	3.47016	3.40185	3.32721	3.25638	3.18742	3.13104	3.09898	3.09329	3.10392	3.12731	3.16291	3.20941	3.24939	3.27474	3.293	3.31733	3.33699	3.34575	3.35004	3.36215	3.38256	3.40418	3.41909	3.43401	3.44966
75	3.48886	3.62763	3.75358	3.85643	3.92564	3.9555	3.9714	3.97307	3.9498	3.9151	3.90658	3.91519	3.90614	3.8884	3.87654	3.86785	3.84984	3.82411	3.7874	3.74243	3.69886	3.64977	3.59909	3.55544	3.51345	3.45223	3.36721	3.27376	3.19937	3.15501	3.13315	3.12085	3.12867	3.1566	3.19577	3.23679	3.27288	3.2995	3.31882	3.33797	3.35483	3.36607	3.3724	3.38179	3.3991	3.42176	3.44205	3.45803	3.46875
76	3.7396	3.8908	4.01549	4.1133	4.18194	4.21645	4.22581	4.21551	4.19106	4.1615	4.13319	4.11	4.09357	4.08696	4.07595	4.04977	4.01384	3.9783	3.94269	3.9011	3.84692	3.78544	3.73331	3.69416	3.6418	3.56427	3.46882	3.37581	3.30639	3.25701	3.22053	3.20363	3.21283	3.23468	3.25953	3.2942	3.3262	3.3516	3.37455	3.39327	3.40215	3.40695	3.41772	3.43006	3.44296	3.45782	3.47622	3.49328	3.50122
77	2.68017	2.7907	2.89213	2.98566	3.04948	3.07879	3.094	3.0975	3.0961	3.1069	3.1063	3.0983	3.1047	3.12151	3.13261	3.13131	3.12371	3.1135	3.0983	3.07619	3.05198	3.03068	3.01167	2.98936	2.95515	2.90724	2.84982	2.7913	2.75059	2.72718	2.71388	2.71408	2.74139	2.7854	2.83472	2.89273	2.94475	2.97956	3.00087	3.02578	3.05298	3.07859	3.1034	3.13011	3.15712	3.18322	3.20933	3.23474	3.25695
78	2.51879	2.63359	2.75419	2.86765	2.93687	2.95114	2.95314	2.95381	2.94701	2.93196	2.93943	2.97599	3.01043	3.00798	3.01077	3.03517	3.04398	3.01756	2.99003	2.98569	2.98067	2.95047	2.91458	2.90076	2.89151	2.84926	2.78016	2.72254	2.69155	2.6658	2.6395	2.64139	2.67929	2.73078	2.77748	2.82497	2.873	2.9158	2.94612	2.9683	2.99237	3.02002	3.04643	3.06995	3.09235	3.11843	3.15131	3.18442	3.21284
79	2.21147	2.30949	2.39635	2.47225	2.52644	2.5571	2.58123	2.60275	2.62074	2.63552	2.64186	2.6506	2.67362	2.69092	2.69283	2.69383	2.71454	2.72671	2.71655	2.69514	2.68438	2.67513	2.66136	2.64417	2.6306	2.60426	2.55992	2.51217	2.47346	2.44823	2.43948	2.44531	2.47577	2.53579	2.60848	2.66337	2.7072	2.74279	2.76984	2.79386	2.82131	2.85358	2.88907	2.92667	2.96125	2.99031	3.01816	3.04962	3.08119
80	2.2651	2.40567	2.4995	2.55928	2.6087	2.65508	2.68224	2.68814	2.6868	2.6935	2.70708	2.7263	2.74998	2.7733	2.7901	2.79859	2.8027	2.80833	2.80842	2.79859	2.78706	2.76999	2.74855	2.73139	2.72129	2.69323	2.64319	2.58966	2.54427	2.51272	2.50111	2.51451	2.55124	2.60682	2.67241	2.7372	2.78492	2.8145	2.83907	2.86928	2.90243	2.93549	2.96668	2.99804	3.0303	3.06069	3.08767	3.12136	3.15943
81	2.0553	2.17978	2.28301	2.36204	2.42089	2.4575	2.46688	2.47081	2.4934	2.52484	2.5377	2.54171	2.56449	2.59503	2.61405	2.62182	2.63503	2.64396	2.64709	2.64593	2.63548	2.61449	2.60003	2.60038	2.59333	2.56797	2.52707	2.48287	2.44965	2.4292	2.41777	2.41741	2.4442	2.49983	2.57118	2.63619	2.69004	2.73389	2.76827	2.79381	2.82051	2.85185	2.8848	2.92079	2.95714	2.99063	3.02215	3.0593	3.0985
82	2.89002	3.00873	3.09574	3.17266	3.25445	3.32591	3.35713	3.35037	3.33149	3.32021	3.30965	3.30419	3.3138	3.32247	3.32674	3.33018	3.33007	3.31321	3.28983	3.26513	3.22786	3.19011	3.16281	3.14322	3.11473	3.06428	2.99745	2.93644	2.89121	2.8556	2.83126	2.82937	2.85109	2.89727	2.95638	3.00232	3.03627	3.06725	3.09717	3.12055	3.14429	3.16756	3.18406	3.20222	3.2262	3.2535	3.27819	3.30181	3.32366
83	2.47685	2.58585	2.68429	2.76507	2.81943	2.85371	2.8792	2.89144	2.89135	2.89882	2.91031	2.92413	2.94141	2.95299	2.95981	2.9669	2.97232	2.96821	2.95719	2.94215	2.92366	2.91049	2.89882	2.88117	2.85959	2.82391	2.77208	2.71772	2.67822	2.64786	2.62797	2.63367	2.66402	2.71146	2.76946	2.83456	2.87986	2.9061	2.93393	2.96541	2.98969	3.0108	3.04003	3.06964	3.09943	3.12857	3.15276	3.17919	3.20955
84	2.39191	2.54268	2.65512	2.73369	2.80407	2.86394	2.87021	2.84432	2.83512	2.85908	2.88558	2.89245	2.88972	2.91793	2.95343	2.96091	2.93735	2.92097	2.92056	2.92339	2.90995	2.88527	2.8701	2.86879	2.84745	2.80023	2.74391	2.6979	2.66352	2.63156	2.60436	2.60436	2.64956	2.71195	2.76312	2.81378	2.86454	2.90256	2.92299	2.94584	2.97567	3.00874	3.03756	3.05889	3.08276	3.11663	3.15415	3.18408	3.20744
85	2.51101	2.64471	2.75518	2.83954	2.90595	2.95919	2.98003	2.97667	2.97105	2.9716	2.98167	2.99949	3.01888	3.04218	3.06069	3.06583	3.06267	3.05034	3.02738	3.00593	3.00107	2.99257	2.97427	2.95124	2.92959	2.90423	2.86352	2.80336	2.74367	2.70268	2.68692	2.69247	2.72468	2.77711	2.83508	2.88641	2.92986	2.96331	2.98784	3.01292	3.04211	3.07316	3.10187	3.13024	3.15896	3.1876	3.21646	3.24551	3.27251
86	1.97639	2.09465	2.19226	2.27428	2.34314	2.38529	2.4005	2.41452	2.44139	2.45573	2.46022	2.47243	2.50198	2.52364	2.53633	2.55177	2.5747	2.58147	2.57273	2.56138	2.55579	2.555	2.55287	2.54113	2.5171	2.49433	2.47212	2.43784	2.39144	2.35464	2.34535	2.36583	2.40593	2.45738	2.51521	2.57493	2.62733	2.66664	2.69516	2.72983	2.77088	2.80728	2.83328	2.86463	2.90261	2.94106	2.9747	3.0096	3.04782
87	2.44737	2.58354	2.7101	2.79897	2.84537	2.87022	2.89757	2.91631	2.90769	2.89777	2.9128	2.93986	2.9584	2.97804	2.98735	2.98565	2.98375	2.97944	2.96631	2.94487	2.92804	2.91902	2.9095	2.89186	2.86972	2.84397	2.80799	2.75489	2.69697	2.65609	2.64055	2.64296	2.66871	2.71911	2.78384	2.84447	2.89206	2.92383	2.94507	2.97022	2.99958	3.02693	3.04978	3.07513	3.10239	3.13135	3.16551	3.19698	3.22123
[truncated: 1,552 more columns]
